# Supplementary material for: RNA-SEQ Reveals Transcriptional Level Changes of Poplar Roots in Different Forms of Nitrogen Treatments
Source: Front Plant Sci. 2016 Feb 2;7:51. doi: 10.3389/fpls.2016.00051 (PMC4735414; doi:10.3389/fpls.2016.00051)
Supplement: Table S5 — The annotation results of expression pattern clustering analysis. [file Table5.XLSX]

## Sheet: Sheet1
	BinName	id	type	description
CLUSTER 1	cell wall.modification	potri.005g244100.1|pacid:27028511	Transcript	moderately similar to ( 384) AT1G20190 | Symbols: ATEXPA11, EXP11, ATEXP11, ATHEXP ALPHA 1.14 | ATEXPA11 (ARABIDOPSIS THALIANA EXPANSIN 11) | chr1:6998762-6999710 REVERSEmoderately similar to ( 379) EXPA1_ORYSA Expansin-A1 precursor (OsEXPA1) (Alpha-expansin-1) (OsEXP1) (OsaEXPa1.16) (RiExA) - Oryza sativa (Rice)moderately similar to ( 379) loc_os04g15840 12004.m06765 protein alpha-expansin 1 pre…	EXPA11 expansin 11
CLUSTER 1	cell wall.modification	potri.002g017900.1|pacid:27020961	Transcript	moderately similar to ( 388) AT1G20190 | Symbols: ATEXPA11, EXP11, ATEXP11, ATHEXP ALPHA 1.14 | ATEXPA11 (ARABIDOPSIS THALIANA EXPANSIN 11) | chr1:6998762-6999710 REVERSEmoderately similar to ( 372) EXPA1_ORYSA Expansin-A1 precursor (OsEXPA1) (Alpha-expansin-1) (OsEXP1) (OsaEXPa1.16) (RiExA) - Oryza sativa (Rice)moderately similar to ( 372) loc_os04g15840 12004.m06765 protein alpha-expansin 1 pre…	EXPA11 expansin 11
CLUSTER 1	cell wall.modification	potri.013g134300.1|pacid:26994647	Transcript	moderately similar to ( 408) AT4G28250 | Symbols: ATEXPB3, EXPB3, ATHEXP BETA 1.6 | ATEXPB3 (ARABIDOPSIS THALIANA EXPANSIN B3) | chr4:14000446-14001945 REVERSEmoderately similar to ( 373) EXB17_ORYSA Expansin-B17 precursor (OsEXPB17) (Beta-expansin-17) (OsaEXPb1.13) - Oryza sativa (Rice)moderately similar to ( 360) loc_os02g42650 12002.m09300 protein beta-expansin 3 precursor, putative, expressed…	expansin B3
CLUSTER 1	lipid metabolism.Phospholipid synthesis.diacylglycerol kinase	potri.005g070900.4|pacid:27031187	Transcript	highly similar to ( 597) AT5G63770 | Symbols: ATDGK2 | ATDGK2 (Diacylglycerol kinase 2); diacylglycerol kinase | chr5:25519755-25522404 FORWARDhighly similar to ( 509) loc_os12g12260 12012.m05200 protein diacylglycerol kinase 1, putative, expressedDAGKc DAGK_cat no original description	DGK2 diacylglycerol kinase 2
CLUSTER 1	metal handling.binding, chelation and storage	potri.019g106500.1|pacid:27025918	Transcript	weakly similar to ( 197) AT1G06330 | Symbols: | copper-binding family protein | chr1:1931671-1932266 REVERSEweakly similar to ( 129) loc_os01g55320 12001.m11691 protein copper ion binding protein, putative, expressed no original description	Heavy metal transport/detoxification superfamily protein
CLUSTER 1	secondary metabolism.isoprenoids.carotenoids.phytoene synthase	potri.001g007700.1|pacid:27040595	Transcript	moderately similar to ( 439) AT5G17230 | Symbols: | phytoene synthase (PSY) / geranylgeranyl-diphosphate geranylgeranyl transferase | chr5:5659839-5662087 REVERSEmoderately similar to ( 443) PSY_CAPAN Phytoene synthase, chloroplast precursor (EC 2.5.1.-) - Capsicum annuum (Bell pepper)moderately similar to ( 434) loc_os06g51290 12006.m31943 protein phytoene synthase, chloroplast precursor, putati…	PSY PHYTOENE SYNTHASE
CLUSTER 1	secondary metabolism.phenylpropanoids	potri.011g153500.1|pacid:27001072	Transcript	moderately similar to ( 386) AT5G17540 | Symbols: | transferase family protein | chr5:5782061-5783682 REVERSEweakly similar to ( 157) HCBT1_DIACA Anthranilate N-benzoyltransferase protein 1 (EC 2.3.1.144) (Anthranilate N-hydroxycinnamoyl/benzoyltransferase 1) - Dianthus caryophyllus (Carnation) (Clove pink)moderately similar to ( 374) loc_os10g35950 12010.m06411 protein 10-deacetylbaccatin III 10…	HXXXD-type acyl-transferase family protein
CLUSTER 1	hormone metabolism.auxin.induced-regulated-responsive-activated	potri.010g253800.1|pacid:26982497	Transcript	weakly similar to ( 135) AT2G24400 | Symbols: | auxin-responsive protein, putative / small auxin up RNA (SAUR_D) | chr2:10377993-10378529 REVERSEweakly similar to ( 105) loc_os04g51890 12004.m10084 protein OsSAUR20 - Auxin-responsive SAUR gene family member, expressedAuxin_inducible no original description	SAUR-like auxin-responsive protein family
CLUSTER 1	hormone metabolism.jasmonate.synthesis-degradation.lipoxygenase	potri.009g022400.1|pacid:26986065	Transcript	nearly identical (1005) AT3G45140 | Symbols: LOX2, ATLOX2 | LOX2 (LIPOXYGENASE 2); lipoxygenase | chr3:16525437-16529233 FORWARDhighly similar to ( 973) LOX23_HORVU Lipoxygenase 2.3, chloroplast precursor (EC 1.13.11.12) (LOX2:Hv:3) - Hordeum vulgare (Barley)highly similar to ( 981) loc_os02g10120 12002.m06309 protein lipoxygenase 2.3, chloroplast precursor, putative, expressedLipoxygenase PLAT_L…	LOX2 lipoxygenase 2
CLUSTER 1	stress.biotic	potri.001g221100.1|pacid:27045051	Transcript	moderately similar to ( 248) AT1G75800 | Symbols: | pathogenesis-related thaumatin family protein | chr1:28458889-28460447 FORWARDmoderately similar to ( 272) TP1A_MALDO Thaumatin-like protein 1a precursor (Allergen Mal d 2) (Mdtl1) (Pathogenesis-related protein 5a) (PR-5a) - Malus domestica (Apple) (Malus sylvestris)moderately similar to ( 229) loc_os07g23470 12007.m06626 protein thaumatin-like …	Pathogenesis-related thaumatin superfamily protein
CLUSTER 1	stress.biotic	potri.009g083600.1|pacid:26985795	Transcript	weakly similar to ( 191) AT1G50060 | Symbols: | pathogenesis-related protein, putative | chr1:18551186-18552446 FORWARDmoderately similar to ( 205) PRB1_TOBAC Basic form of pathogenesis-related protein 1 precursor (PRP 1) - Nicotiana tabacum (Common tobacco)weakly similar to ( 150) loc_os02g27310 12002.m07875 protein SCP-like extracellular protein, expressedSCP SCP SCP no original description	CAP (Cysteine-rich secretory proteins, Antigen 5, and Pathogenesis-related 1 protein) superfamily protein
CLUSTER 1	stress.biotic.PR-proteins	potri.001g054100.1|pacid:27045787	Transcript	moderately similar to ( 283) AT4G13580 | Symbols: | disease resistance-responsive family protein | chr4:7900427-7901161 FORWARDmoderately similar to ( 261) loc_os03g05030 12003.m06028 protein dirigent-like protein, expressedDirigent no original description	Disease resistance-responsive (dirigent-like protein) family protein
CLUSTER 1	stress.biotic.PR-proteins	potri.003g174300.1|pacid:27000075	Transcript	moderately similar to ( 287) AT3G24020 | Symbols: | disease resistance-responsive family protein | chr3:8678827-8679558 FORWARDmoderately similar to ( 256) loc_os03g05030 12003.m06028 protein dirigent-like protein, expressedDirigent no original description	Disease resistance-responsive (dirigent-like protein) family protein
CLUSTER 1	Biodegradation of Xenobiotics.lactoylglutathione lyase	potri.007g015100.1|pacid:27016250	Transcript	weakly similar to ( 168) AT1G15380 | Symbols: | lactoylglutathione lyase family protein / glyoxalase I family protein | chr1:5290955-5292287 FORWARDweakly similar to ( 167) loc_os05g07940 12005.m27715 protein lactoylglutathione lyase, putative, expressed no original description	Lactoylglutathione lyase / glyoxalase I family protein
CLUSTER 1	misc.oxidases - copper, flavone etc	potri.007g038200.1|pacid:27015829	Transcript	highly similar to ( 756) AT2G23630 | Symbols: sks16 | sks16 (SKU5 Similar 16); copper ion binding / pectinesterase | chr2:10052581-10055311 REVERSEhighly similar to ( 541) ASO_BRANA L-ascorbate oxidase homolog precursor (EC 1.10.3.3) (Ascorbase) - Brassica napus (Rape)highly similar to ( 583) loc_os07g02810 12007.m04753 protein L-ascorbate oxidase homolog precursor, putative, expressedCu-oxidase_…	sks15 SKU5 similar 15
CLUSTER 1	misc.peroxidases	potri.007g132800.1|pacid:27016267	Transcript	moderately similar to ( 450) AT2G43480 | Symbols: | peroxidase, putative | chr2:18053009-18054350 FORWARDmoderately similar to ( 203) PER2_ARAHY Cationic peroxidase 2 precursor (EC 1.11.1.7) (PNPC2) - Arachis hypogaea (Peanut)moderately similar to ( 221) loc_os10g41720 12010.m06931 protein peroxidase 60 precursor, putative, expressedsecretory_peroxidase plant_peroxidase peroxidase no original des…	Peroxidase superfamily protein
CLUSTER 1	misc.protease inhibitor/seed storage/lipid transfer protein (LTP) family protein	potri.013g128800.1|pacid:26993828	Transcript	very weakly similar to (95.1) AT4G12480 | Symbols: pEARLI 1 | pEARLI 1; lipid binding | chr4:7406371-7406877 REVERSEvery weakly similar to (97.4) 14KD_DAUCA 14 kDa proline-rich protein DC2.15 precursor - Daucus carota (Carrot)very weakly similar to (87.0) loc_os03g01300 12003.m101723 protein cortical cell-delineating protein precursor, putative, expressedHPS_like no original description	Bifunctional inhibitor/lipid-transfer protein/seed storage 2S albumin superfamily protein
CLUSTER 1	misc.short chain dehydrogenase/reductase (SDR)	potri.016g074000.1|pacid:27013731	Transcript	moderately similar to ( 239) AT1G52340 | Symbols: ABA2, SIS4, GIN1, SDR1, ISI4, SRE1, ATABA2, ATSDR1 | ABA2 (ABA DEFICIENT 2); alcohol dehydrogenase/ oxidoreductase/ xanthoxin dehydrogenase | chr1:19489997-19491527 REVERSEmoderately similar to ( 207) TS2_MAIZE Sex determination protein tasselseed-2 - Zea mays (Maize)moderately similar to ( 277) loc_os04g10000 12004.m06252 protein sex determinatio…	NAD(P)-binding Rossmann-fold superfamily protein
CLUSTER 1	RNA.regulation of transcription.ARF, Auxin Response Factor family	potri.002g207000.1|pacid:27023685	Transcript	very weakly similar to (95.1) AT5G62000 | Symbols: ARF2, ARF1-BP, HSS | ARF2 (AUXIN RESPONSE FACTOR 2); protein binding / transcription factor | chr5:24910859-24914680 FORWARDweakly similar to ( 105) loc_os12g29520 12012.m073714 protein auxin response factor 2, putative, expressed no original description	ARF2,HSS,ORE14 auxin response factor 2
CLUSTER 1	RNA.regulation of transcription.C2C2(Zn) GATA transcription factor family	potri.001g188500.2|pacid:27040849	Transcript	weakly similar to ( 184) AT4G32890 | Symbols: | zinc finger (GATA type) family protein | chr4:15875598-15876615 FORWARDweakly similar to ( 168) loc_os01g54210 12001.m11585 protein GATA transcription factor 13, putative, expressed no original description	GATA family protein
CLUSTER 1	RNA.regulation of transcription.MYB domain transcription factor family	potri.017g125700.1|pacid:26984018	Transcript	weakly similar to ( 196) AT1G66370 | Symbols: MYB113, AtMYB113 | MYB113 (myb domain protein 113); DNA binding / transcription factor | chr1:24753634-24754604 FORWARDweakly similar to ( 154) MYBC_MAIZE Anthocyanin regulatory C1 protein - Zea mays (Maize)weakly similar to ( 146) loc_os03g29614 12003.m08231 protein anthocyanin regulatory C1 protein, putative, expressed no original description	MYB family protein
CLUSTER 1	RNA.regulation of transcription.putative transcription regulator	potri.018g139700.1|pacid:27010435	Transcript	moderately similar to ( 379) AT2G19330 | Symbols: | leucine-rich repeat family protein | chr2:8372947-8374453 FORWARDmoderately similar to ( 333) loc_os04g51580 12004.m101439 protein leucine-rich repeat-containing protein 40, putative, expressed no original description	PIRL6 plant intracellular ras group-related LRR 6
CLUSTER 1	RNA.regulation of transcription.putative transcription regulator	potri.006g072700.1|pacid:27006775	Transcript	moderately similar to ( 397) AT2G19330 | Symbols: | leucine-rich repeat family protein | chr2:8372947-8374453 FORWARDmoderately similar to ( 348) loc_os04g51580 12004.m101439 protein leucine-rich repeat-containing protein 40, putative, expressed no original description	PIRL6 plant intracellular ras group-related LRR 6
CLUSTER 1	DNA.unspecified	potri.001g301700.1|pacid:27044005	Transcript	moderately similar to ( 349) AT4G35220 | Symbols: | cyclase family protein | chr4:16752636-16753966 FORWARDmoderately similar to ( 342) loc_os08g23100 12008.m080125 protein cyclase, putative, expressedCyclase COG1878 no original description	Cyclase family protein
CLUSTER 1	signalling.in sugar and nutrient physiology	potri.009g040000.1|pacid:26988773	Transcript	weakly similar to ( 134) AT5G52390 | Symbols: | photoassimilate-responsive protein, putative | chr5:21264281-21265173 REVERSEPAR1 no original description	PAR1 protein
CLUSTER 1	signalling.light	potri.009g157600.1|pacid:26986171	Transcript	moderately similar to ( 217) AT5G28490 | Symbols: LSH1 | LSH1 (LIGHT-DEPENDENT SHORT HYPOCOTYLS 1) | chr5:10454541-10455113 REVERSEmoderately similar to ( 201) loc_os02g07030 12002.m06050 protein expressed proteinDUF640 no original description	LSH1 Protein of unknown function (DUF640)
CLUSTER 1	development.late embryogenesis abundant	potri.009g145700.1|pacid:26986257	Transcript	moderately similar to ( 343) AT3G19430 | Symbols: | late embryogenesis abundant protein-related / LEA protein-related | chr3:6736382-6738330 REVERSEmoderately similar to ( 299) loc_os05g47940 12005.m08866 protein transposon protein, putative, unclassified, expressedRoot_cap no original description	late embryogenesis abundant protein-related / LEA protein-related
CLUSTER 1	development.unspecified	potri.010g241500.1|pacid:26980995	Transcript	weakly similar to ( 157) AT5G04820 | Symbols: ATOFP13, OFP13 | OFP13 (ARABIDOPSIS THALIANA OVATE FAMILY PROTEIN 13) | chr5:1399685-1400467 FORWARDweakly similar to ( 127) loc_os01g64410 12001.m12555 protein plant-specific domain TIGR01568 family protein, expressedDUF623 no original description	OFP13 ovate family protein 13
CLUSTER 1	transport.metal	potri.018g148900.1|pacid:27010962	Transcript	no original description	Heavy metal transport/detoxification superfamily protein
CLUSTER 1	transport.metal	potri.015g117900.1|pacid:27017405	Transcript	moderately similar to ( 417) AT1G31260 | Symbols: ZIP10 | ZIP10 (ZINC TRANSPORTER 10 PRECURSOR); cation transmembrane transporter/ metal ion transmembrane transporter | chr1:11175559-11177362 REVERSEmoderately similar to ( 369) loc_os03g46470 12003.m09667 protein zinc transporter 10 precursor, putative, expressedZip no original description	ZIP10 zinc transporter 10 precursor
CLUSTER 1	not assigned.unknown	potri.005g217900.1|pacid:27031188	Transcript	no original description
CLUSTER 1	not assigned.unknown	potri.004g003400.1|pacid:26991518	Transcript	no original description
CLUSTER 1	not assigned.unknown	potri.002g076400.1|pacid:27022301	Transcript	no original description
CLUSTER 1	not assigned.unknown	potri.t011300.2|pacid:27051457	Transcript	no original description
CLUSTER 1	not assigned.unknown	potri.007g041400.1|pacid:27015484	Transcript	no original description
CLUSTER 1	not assigned.unknown	potri.016g075300.1|pacid:27011961	Transcript	weakly similar to ( 152) AT5G06200 | Symbols: | integral membrane family protein | chr5:1877333-1878116 FORWARDweakly similar to ( 105) loc_os08g01160 12008.m04265 protein plant integral membrane protein TIGR01569 containing proteinDUF588 no original description
CLUSTER 1	not assigned.unknown	potri.019g117800.1|pacid:27025539	Transcript	no original description
CLUSTER 1	not assigned.unknown	potri.016g130200.1|pacid:27012819	Transcript	very weakly similar to (91.7) AT2G38420 | Symbols: | pentatricopeptide (PPR) repeat-containing protein | chr2:16091120-16092454 FORWARD no original description
CLUSTER 1	not assigned.unknown	potri.t105700.1|pacid:27019771	Transcript	no original description
CLUSTER 1	not assigned.unknown	potri.015g063300.1|pacid:27018463	Transcript	no original description
CLUSTER 1	not assigned.unknown	potri.005g005200.1|pacid:27030367	Transcript	no original description
CLUSTER 1	not assigned.unknown	potri.009g072200.1|pacid:26986886	Transcript	no original description
CLUSTER 1	not assigned.unknown	potri.016g115700.1|pacid:27011691	Transcript	no original description
CLUSTER 1	not assigned.unknown	potri.012g032300.1|pacid:27049491	Transcript	weakly similar to ( 190) AT5G15290 | Symbols: | integral membrane family protein | chr5:4967094-4967846 FORWARDweakly similar to ( 192) loc_os06g12500 12006.m05966 protein plant integral membrane protein TIGR01569 containing protein, expressedDUF588 no original description
CLUSTER 1	not assigned.unknown	potri.010g170800.1|pacid:26980153	Transcript	no original description
CLUSTER 1	not assigned.unknown	potri.019g123900.1|pacid:27024890	Transcript	weakly similar to ( 154) AT2G30230 | Symbols: | unknown protein | chr2:12897156-12897689 FORWARDweakly similar to ( 133) loc_os03g18660 12003.m07287 protein conserved hypothetical protein no original description
CLUSTER 1	not assigned.unknown	potri.015g142100.1|pacid:27018685	Transcript	no original description
CLUSTER 1	not assigned.unknown	potri.016g025400.1|pacid:27012752	Transcript	no original description
CLUSTER 1	not assigned.unknown	potri.005g025200.2|pacid:27029541	Transcript	highly similar to ( 588) AT5G27730 | Symbols: | unknown protein | chr5:9820311-9822868 FORWARDhighly similar to ( 590) loc_os01g70550 12001.m43367 protein expressed proteinCOG4299 no original description
CLUSTER 1	not assigned.unknown	potri.t052700.1|pacid:27027157	Transcript	no original description
CLUSTER 1	not assigned.unknown	potri.007g141300.1|pacid:27016575	Transcript	no original description
CLUSTER 1	not assigned.unknown	potri.014g095600.1|pacid:27032061	Transcript	no original description
CLUSTER 1	not assigned.unknown	potri.008g216100.1|pacid:27037603	Transcript	no original description
CLUSTER 1	not assigned.unknown	potri.005g080400.1|pacid:27028632	Transcript	no original description
CLUSTER 1	not assigned.unknown	potri.001g268300.1|pacid:27040168	Transcript	no original description
CLUSTER 1	not assigned.unknown	potri.008g108700.1|pacid:27036795	Transcript	no original description
CLUSTER 1	not assigned.unknown	potri.009g004300.1|pacid:26985892	Transcript	no original description
CLUSTER 1	not assigned.unknown	potri.002g075600.1|pacid:27021318	Transcript	no original description
CLUSTER 1	not assigned.unknown	potri.011g016500.1|pacid:27002283	Transcript	no original description
CLUSTER 1	not assigned.unknown	potri.001g000300.1|pacid:27045442	Transcript	no original description
CLUSTER 1	not assigned.unknown	potri.007g041500.1|pacid:27015759	Transcript	no original description
CLUSTER 1	not assigned.unknown	potri.005g043600.1|pacid:27029854	Transcript	no original description
CLUSTER 1	not assigned.unknown	potri.012g032000.1|pacid:27050783	Transcript	no original description
CLUSTER 1	not assigned.unknown	potri.002g240300.1|pacid:27024251	Transcript	no original description
CLUSTER 1	not assigned.unknown	potri.004g047400.1|pacid:26992893	Transcript	no original description
CLUSTER 1	not assigned.unknown	potri.011g041700.1|pacid:27002695	Transcript	no original description
CLUSTER 1	not assigned.unknown	potri.009g142500.1|pacid:26985856	Transcript	weakly similar to ( 152) AT2G17070 | Symbols: | unknown protein | chr2:7430863-7431654 REVERSEDUF241 no original description
CLUSTER 1	not assigned.unknown	potri.014g118300.1|pacid:27032722	Transcript	no original description
CLUSTER 1	not assigned.unknown	potri.016g047700.1|pacid:27012710	Transcript	no original description
CLUSTER 1	not assigned.unknown	potri.018g040000.1|pacid:27008996	Transcript	no original description
CLUSTER 1	not assigned.unknown	potri.003g216500.1|pacid:26997454	Transcript	moderately similar to ( 368) AT1G55230 | Symbols: | unknown protein | chr1:20602895-20603797 FORWARDmoderately similar to ( 300) loc_os09g27260 12009.m05878 protein TMV response-related gene product, putative, expressedDUF716 no original description
CLUSTER 1	not assigned.unknown	potri.001g399200.1|pacid:27041737	Transcript	weakly similar to ( 133) AT1G53130 | Symbols: GRI | GRI (GRIM REAPER) | chr1:19794947-19795453 REVERSEStig1 no original description
CLUSTER 1	not assigned.unknown	potri.015g089400.1|pacid:27017499	Transcript	no original description
CLUSTER 2	TCA / org transformation.carbonic anhydrases	potri.006g121900.1|pacid:27008497	Transcript	weakly similar to ( 198) AT4G21000 | Symbols: ATACA6, ACA6 | ACA6 (ALPHA CARBONIC ANHYDRASE 6); carbonate dehydratase/ zinc ion binding | chr4:11222529-11223756 FORWARDweakly similar to ( 193) loc_os08g36630 12008.m07651 protein carbonic anhydrase precursor, putative, expressedalpha_CA_prokaryotic_like Cah alpha_CA no original description	alpha carbonic anhydrase 7
CLUSTER 2	cell wall.modification	potri.002g184700.1|pacid:27022008	Transcript	moderately similar to ( 379) AT4G01630 | Symbols: ATEXPA17, ATEXP17, ATHEXP ALPHA 1.13 | ATEXPA17 (ARABIDOPSIS THALIANA EXPANSIN A17) | chr4:700653-701527 FORWARDmoderately similar to ( 310) EXP22_ORYSA Expansin-A22 precursor (OsEXPA22) (Alpha-expansin-22) (OsEXP22) (OsaEXPa1.9) - Oryza sativa (Rice)moderately similar to ( 310) loc_os02g16850 12002.m06928 protein alpha-expansin 3 precursor, putat…	EXPA17 expansin A17
CLUSTER 2	lipid metabolism.'exotics'(steroids, squalene etc)	potri.003g193500.1|pacid:26997431	Transcript	moderately similar to ( 438) AT5G07010 | Symbols: ATST2A, ST2A | ST2A (SULFOTRANSFERASE 2A); hydroxyjasmonate sulfotransferase/ sulfotransferase | chr5:2174960-2176039 REVERSEmoderately similar to ( 278) loc_os04g44460 12004.m09405 protein flavonol sulfotransferase-like, putative, expressedSulfotransfer_1 no original description	ST2A sulfotransferase 2A
CLUSTER 2	metal handling.binding, chelation and storage	potri.004g056800.1|pacid:26992264	Transcript	weakly similar to ( 143) AT1G06330 | Symbols: | copper-binding family protein | chr1:1931671-1932266 REVERSEweakly similar to ( 140) loc_os01g55320 12001.m11691 protein copper ion binding protein, putative, expressed no original description	Heavy metal transport/detoxification superfamily protein
CLUSTER 2	secondary metabolism.phenylpropanoids	potri.013g120900.1|pacid:26995192	Transcript	very weakly similar to (96.7) 7OMT6_MEDSA Isoflavone-7-O-methyltransferase 6 (EC 2.1.1.150) (Isoflavone-O-methyltransferase 6) (7-IOMT-6) - Medicago sativa (Alfalfa)very weakly similar to (80.9) loc_os12g25450 12012.m06370 protein O-methyltransferase ZRP4, putative, expressed no original description	O-methyltransferase family protein
CLUSTER 2	secondary metabolism.phenylpropanoids	potri.013g122100.1|pacid:26995103	Transcript	weakly similar to ( 102) 7OMT8_MEDSA Isoflavone-7-O-methyltransferase 8 (EC 2.1.1.150) (Isoflavone-O-methyltransferase 8) (7-IOMT-8) - Medicago sativa (Alfalfa)weakly similar to ( 111) loc_os07g28040 12007.m07076 protein O-methyltransferase ZRP4, putative, expressedMethyltransf_2 no original description	O-methyltransferase family protein
CLUSTER 2	secondary metabolism.phenylpropanoids	potri.019g093000.1|pacid:27026106	Transcript	moderately similar to ( 229) AT4G35160 | Symbols: | O-methyltransferase family 2 protein | chr4:16730989-16732808 REVERSEmoderately similar to ( 345) 7OMT8_MEDSA Isoflavone-7-O-methyltransferase 8 (EC 2.1.1.150) (Isoflavone-O-methyltransferase 8) (7-IOMT-8) - Medicago sativa (Alfalfa)moderately similar to ( 318) loc_os12g25450 12012.m06370 protein O-methyltransferase ZRP4, putative, expressedMeth…	O-methyltransferase family protein
CLUSTER 2	stress.biotic	potri.018g007000.1|pacid:27010314	Transcript	weakly similar to ( 186) AT4G31470 | Symbols: | pathogenesis-related protein, putative | chr4:15261746-15262303 REVERSEweakly similar to ( 165) PR12_HORVU Pathogenesis-related protein PRB1-2 precursor - Hordeum vulgare (Barley)weakly similar to ( 158) loc_os01g28500 12001.m43020 protein pathogenesis-related protein PRMS precursor, putative, expressedSCP SCP SCP no original description	CAP (Cysteine-rich secretory proteins, Antigen 5, and Pathogenesis-related 1 protein) superfamily protein
CLUSTER 2	redox.thioredoxin	potri.011g031100.1|pacid:27000839	Transcript	very weakly similar to (91.3) AT1G11530 | Symbols: ATCXXS1 | ATCXXS1 (C-terminal cysteine residue is changed to a serine 1); protein disulfide isomerase | chr1:3874518-3875311 FORWARDvery weakly similar to (82.0) loc_os04g53740 12004.m35046 protein thioredoxin-like 4, putative, expressed no original description	CXXS1 C-terminal cysteine residue is changed to a serine 1
CLUSTER 2	redox.glutaredoxins	potri.002g208700.1|pacid:27023027	Transcript	weakly similar to ( 151) AT1G03020 | Symbols: | glutaredoxin family protein | chr1:698207-698515 REVERSEweakly similar to ( 113) loc_os01g27140 12001.m09165 protein glutaredoxin, putative, expressedGRX_GRXh_1_2_like no original description	Thioredoxin superfamily protein
CLUSTER 2	redox.glutaredoxins	potri.002g209000.1|pacid:27024546	Transcript	weakly similar to ( 133) AT1G03020 | Symbols: | glutaredoxin family protein | chr1:698207-698515 REVERSEvery weakly similar to (97.1) loc_os01g27140 12001.m09165 protein glutaredoxin, putative, expressedGRX_GRXh_1_2_like no original description	Thioredoxin superfamily protein
CLUSTER 2	redox.glutaredoxins	potri.014g134000.1|pacid:27034231	Transcript	weakly similar to ( 151) AT1G03020 | Symbols: | glutaredoxin family protein | chr1:698207-698515 REVERSEweakly similar to ( 122) loc_os01g27140 12001.m09165 protein glutaredoxin, putative, expressedGRX_GRXh_1_2_like no original description	Thioredoxin superfamily protein
CLUSTER 2	misc.cytochrome P450	potri.001g003000.1|pacid:27045248	Transcript	moderately similar to ( 385) AT5G36110 | Symbols: CYP716A1 | CYP716A1; electron carrier/ heme binding / iron ion binding / monooxygenase/ oxygen binding | chr5:14195377-14197613 FORWARDweakly similar to ( 191) C724B_ORYSA Cytochrome P450 724B1 (EC 1.14.-.-) (OsDWARF11) (Dwarf protein 11) - Oryza sativa (Rice)moderately similar to ( 263) loc_os07g33620 12007.m07621 protein taxane 10-beta-hydroxyla…	CYP716A1 cytochrome P450, family 716, subfamily A, polypeptide 1
CLUSTER 2	misc.cytochrome P450	potri.001g083900.1|pacid:27043265	Transcript	highly similar to ( 693) AT2G46660 | Symbols: CYP78A6 | CYP78A6; electron carrier/ heme binding / iron ion binding / monooxygenase/ oxygen binding | chr2:19153602-19155417 REVERSEhighly similar to ( 686) C78A3_SOYBN Cytochrome P450 78A3 (EC 1.14.-.-) - Glycine max (Soybean)highly similar to ( 601) loc_os08g43390 12008.m08313 protein cytochrome P450 78A3, putative, expressedp450 CypX no original d…	CYP78A6 cytochrome P450, family 78, subfamily A, polypeptide 6
CLUSTER 2	misc.cytochrome P450	potri.002g042200.1|pacid:27020357	Transcript	moderately similar to ( 440) AT5G63450 | Symbols: CYP94B1 | CYP94B1; electron carrier/ heme binding / iron ion binding / monooxygenase/ oxygen binding | chr5:25408987-25410519 REVERSEweakly similar to ( 107) C72A1_CATRO Cytochrome P450 72A1 (EC 1.3.3.9) (CYPLXXII) (Secologanin synthase) (SLS) - Catharanthus roseus (Rosy periwinkle) (Madagascar periwinkle)moderately similar to ( 418) loc_os03g1226…	CYP94B1 cytochrome P450, family 94, subfamily B, polypeptide 1
CLUSTER 2	misc.cytochrome P450	potri.002g175200.1|pacid:27023614	Transcript	highly similar to ( 694) AT2G46660 | Symbols: CYP78A6 | CYP78A6; electron carrier/ heme binding / iron ion binding / monooxygenase/ oxygen binding | chr2:19153602-19155417 REVERSEhighly similar to ( 710) C78A3_SOYBN Cytochrome P450 78A3 (EC 1.14.-.-) - Glycine max (Soybean)highly similar to ( 566) loc_os08g43390 12008.m08313 protein cytochrome P450 78A3, putative, expressedp450 CypX no original d…	CYP78A6 cytochrome P450, family 78, subfamily A, polypeptide 6
CLUSTER 2	misc.cytochrome P450	potri.006g057900.1|pacid:27005313	Transcript	highly similar to ( 730) AT2G42250 | Symbols: CYP712A1 | CYP712A1; electron carrier/ heme binding / iron ion binding / monooxygenase/ oxygen binding | chr2:17600075-17601709 REVERSEmoderately similar to ( 440) C93A1_SOYBN Cytochrome P450 93A1 (EC 1.14.-.-) - Glycine max (Soybean)moderately similar to ( 403) loc_os06g41070 12006.m08642 protein cytochrome P450 93A1, putative, expressedp450 CypX no …	CYP712A1 cytochrome P450, family 712, subfamily A, polypeptide 1
CLUSTER 2	misc.cytochrome P450	potri.006g058000.1|pacid:27003619	Transcript	highly similar to ( 734) AT2G42250 | Symbols: CYP712A1 | CYP712A1; electron carrier/ heme binding / iron ion binding / monooxygenase/ oxygen binding | chr2:17600075-17601709 REVERSEmoderately similar to ( 445) C93A1_SOYBN Cytochrome P450 93A1 (EC 1.14.-.-) - Glycine max (Soybean)moderately similar to ( 404) loc_os06g41070 12006.m08642 protein cytochrome P450 93A1, putative, expressedp450 CypX no …	CYP712A1 cytochrome P450, family 712, subfamily A, polypeptide 1
CLUSTER 2	misc.cytochrome P450	potri.009g069100.1|pacid:26987313	Transcript	highly similar to ( 511) AT5G07990 | Symbols: TT7, CYP75B1, D501 | TT7 (TRANSPARENT TESTA 7); flavonoid 3'-monooxygenase/ oxygen binding | chr5:2560437-2562859 FORWARDhighly similar to ( 818) C75A3_PETHY Flavonoid 3',5'-hydroxylase 2 (EC 1.14.13.88) (F3'5'H) (Cytochrome P450 75A3) (CYPLXXVA3) - Petunia hybrida (Petunia)highly similar to ( 567) loc_os03g25150 12003.m07859 protein flavonoid 3,5-hyd…	CYP75B1,D501,TT7 Cytochrome P450 superfamily protein
CLUSTER 2	misc.cytochrome P450	potri.010g139400.1|pacid:26981381	Transcript	moderately similar to ( 402) AT2G26710 | Symbols: BAS1, CYP734A1, CYP72B1 | BAS1 (PHYB ACTIVATION TAGGED SUPPRESSOR 1); oxygen binding / steroid hydroxylase | chr2:11380700-11383413 FORWARDmoderately similar to ( 364) C72A1_CATRO Cytochrome P450 72A1 (EC 1.3.3.9) (CYPLXXII) (Secologanin synthase) (SLS) - Catharanthus roseus (Rosy periwinkle) (Madagascar periwinkle)moderately similar to ( 416) loc…	BAS1,CYP72B1,CYP734A1 Cytochrome P450 superfamily protein
CLUSTER 2	misc.cytochrome P450	potri.010g139600.1|pacid:26982028	Transcript	moderately similar to ( 394) AT2G26710 | Symbols: BAS1, CYP734A1, CYP72B1 | BAS1 (PHYB ACTIVATION TAGGED SUPPRESSOR 1); oxygen binding / steroid hydroxylase | chr2:11380700-11383413 FORWARDmoderately similar to ( 366) C72A1_CATRO Cytochrome P450 72A1 (EC 1.3.3.9) (CYPLXXII) (Secologanin synthase) (SLS) - Catharanthus roseus (Rosy periwinkle) (Madagascar periwinkle)moderately similar to ( 417) loc…	BAS1,CYP72B1,CYP734A1 Cytochrome P450 superfamily protein
CLUSTER 2	misc.cytochrome P450	potri.011g137800.1|pacid:27000763	Transcript	moderately similar to ( 281) AT5G36110 | Symbols: CYP716A1 | CYP716A1; electron carrier/ heme binding / iron ion binding / monooxygenase/ oxygen binding | chr5:14195377-14197613 FORWARDmoderately similar to ( 207) C90D2_ORYSA Cytochrome P450 90D2 (EC 1.14.-.-) (C6-oxidase) - Oryza sativa (Rice)moderately similar to ( 442) loc_os07g33440 12007.m07604 protein taxane 13-alpha-hydroxylase, putative, …	CYP716A1 cytochrome P450, family 716, subfamily A, polypeptide 1
CLUSTER 2	misc.cytochrome P450	potri.012g071300.1|pacid:27048970	Transcript	moderately similar to ( 286) AT1G05160 | Symbols: CYP88A3, ATKAO1, KAO1 | CYP88A3 (CYTOCHROME P450 88 A3); ent-kaurenoate oxidase/ oxygen binding | chr1:1487640-1489828 REVERSEmoderately similar to ( 303) KAO1_HORVU Ent-kaurenoic acid oxidase 1 (EC 1.14.13.79) (gpr5) - Hordeum vulgare (Barley)highly similar to ( 525) loc_os10g23180 12010.m22019 protein ent-kaurenoic acid oxidase 1, putative, expr…	ATKAO1,CYP88A3,KAO1 cytochrome P450, family 88, subfamily A, polypeptide 3
CLUSTER 2	misc.cytochrome P450	potri.014g102700.1|pacid:27032513	Transcript	highly similar to ( 719) AT2G46660 | Symbols: CYP78A6 | CYP78A6; electron carrier/ heme binding / iron ion binding / monooxygenase/ oxygen binding | chr2:19153602-19155417 REVERSEhighly similar to ( 757) C78A3_SOYBN Cytochrome P450 78A3 (EC 1.14.-.-) - Glycine max (Soybean)highly similar to ( 604) loc_os08g43390 12008.m08313 protein cytochrome P450 78A3, putative, expressedp450 CypX no original d…	CYP78A6 cytochrome P450, family 78, subfamily A, polypeptide 6
CLUSTER 2	misc.peroxidases	potri.003g214800.1|pacid:26998515	Transcript	moderately similar to ( 412) AT5G06720 | Symbols: | peroxidase, putative | chr5:2077567-2078857 REVERSEmoderately similar to ( 385) PERX_TOBAC Lignin-forming anionic peroxidase precursor (EC 1.11.1.7) (TOPA) - Nicotiana tabacum (Common tobacco)moderately similar to ( 383) loc_os03g13200 12003.m06766 protein peroxidase 53 precursor, putative, expressedsecretory_peroxidase plant_peroxidase peroxida…	ATPA2,PA2 peroxidase 2
CLUSTER 2	misc.acid and other phosphatases	potri.016g139700.1|pacid:27012144	Transcript	moderately similar to ( 351) AT2G38600 | Symbols: | acid phosphatase class B family protein | chr2:16145907-16146857 FORWARDweakly similar to ( 166) VSPB_SOYBN Stem 31 kDa glycoprotein precursor (Vegetative storage protein B) - Glycine max (Soybean)moderately similar to ( 282) loc_os03g21480 12003.m07552 protein stem 31 kDa glycoprotein precursor, putative, expressedAcid_phosphat_B no original de…	HAD superfamily, subfamily IIIB acid phosphatase
CLUSTER 2	misc.invertase/pectin methylesterase inhibitor family protein	potri.015g128900.1|pacid:27018674	Transcript	weakly similar to ( 121) AT1G62760 | Symbols: | invertase/pectin methylesterase inhibitor family protein | chr1:23237574-23238512 REVERSEweakly similar to ( 105) 21KD_DAUCA 21 kDa protein precursor (1.2 protein) - Daucus carota (Carrot)very weakly similar to (96.7) loc_os06g49760 12006.m09500 protein ripening-related protein, putative, expressedPMEI no original description	Plant invertase/pectin methylesterase inhibitor superfamily protein
CLUSTER 2	misc.plastocyanin-like	potri.010g243600.1|pacid:26978440	Transcript	very weakly similar to (99.0) loc_os03g44630 12003.m09501 protein umecyanin, putative, expressedCu_bind_like no original description	ATBCB,BCB,SAG14 blue-copper-binding protein
CLUSTER 2	misc.UDP glucosyl and glucoronyl transferases	potri.004g119700.1|pacid:26989612	Transcript	moderately similar to ( 461) AT3G02100 | Symbols: | UDP-glucoronosyl/UDP-glucosyl transferase family protein | chr3:368840-370484 REVERSEweakly similar to ( 167) IAAG_MAIZE Indole-3-acetate beta-glucosyltransferase (EC 2.4.1.121) (IAA-Glu synthetase) ((Uridine 5'-diphosphate-glucose:indol-3-ylacetyl)-beta-D-glucosyl transferase) - Zea mays (Maize)moderately similar to ( 427) loc_os03g55040 12003.…	UDP-Glycosyltransferase superfamily protein
CLUSTER 2	misc.protease inhibitor/seed storage/lipid transfer protein (LTP) family protein	potri.006g256100.1|pacid:27004742	Transcript	very weakly similar to (99.4) AT2G45180 | Symbols: | protease inhibitor/seed storage/lipid transfer protein (LTP) family protein | chr2:18626377-18626781 FORWARDvery weakly similar to (91.7) 14KD_DAUCA 14 kDa proline-rich protein DC2.15 precursor - Daucus carota (Carrot)very weakly similar to (91.3) loc_os03g01320 12003.m34972 protein NT16 polypeptide, putative, expressedHPS_like no original desc…	Bifunctional inhibitor/lipid-transfer protein/seed storage 2S albumin superfamily protein
CLUSTER 2	misc.nitrilases, *nitrile lyases, berberine bridge enzymes, reticuline oxidases, troponine reductases	potri.019g063400.1|pacid:27025068	Transcript	moderately similar to ( 354) AT4G20860 | Symbols: | FAD-binding domain-containing protein | chr4:11172726-11174318 FORWARDmoderately similar to ( 466) loc_os08g06190 12008.m04758 protein reticuline oxidase precursor, putative, expressedGlcD FAD_binding_4 no original description	FAD-binding Berberine family protein
CLUSTER 2	RNA.transcription	potri.008g139400.1|pacid:27036579	Transcript	very weakly similar to (87.4) AT1G03280 | Symbols: | transcription initiation factor IIE (TFIIE) alpha subunit family protein / general transcription factor TFIIE family protein | chr1:803635-806758 FORWARD no original description	Transcription factor TFIIE, alpha subunit
CLUSTER 2	DNA.synthesis/chromatin structure	potri.008g139600.1|pacid:27038684	Transcript	highly similar to ( 538) AT2G01900 | Symbols: | endonuclease/exonuclease/phosphatase family protein | chr2:406136-408933 FORWARDmoderately similar to ( 414) loc_os03g13520 12003.m35117 protein type I inositol-1,4,5-trisphosphate 5-phosphatase CVP2, putative, expressedIPPc COG5411 Exo_endo_phos no original description	DNAse I-like superfamily protein
CLUSTER 2	protein.postranslational modification	potri.015g085100.3|pacid:27017456	Transcript	weakly similar to ( 176) AT5G50200 | Symbols: WR3, ATNRT3.1, NRT3.1 | WR3 (WOUND-RESPONSIVE 3); nitrate transmembrane transporter | chr5:20436612-20437535 FORWARDweakly similar to ( 139) loc_os02g38230 12002.m08911 protein component of high affinity nitrate transporter, putative, expressed no original description	WR3 nitrate transmembrane transporters
CLUSTER 2	signalling.calcium	potri.001g414600.1|pacid:27041890	Transcript	weakly similar to ( 115) AT4G27280 | Symbols: | calcium-binding EF hand family protein | chr4:13663770-13664162 REVERSEweakly similar to ( 112) loc_os06g46950 12006.m09221 protein EF-hand Ca2+-binding protein CCD1, putative, expressed no original description	Calcium-binding EF-hand family protein
CLUSTER 2	signalling.calcium	potri.005g052800.1|pacid:27029519	Transcript	weakly similar to ( 186) AT2G27030 | Symbols: CAM5 | CAM5 (CALMODULIN 5); calcium ion binding | chr2:11532719-11533060 FORWARDweakly similar to ( 185) CALM3_PETHY Calmodulin-related protein - Petunia hybrida (Petunia)weakly similar to ( 179) loc_os01g59530 12001.m43237 protein calmodulin-related protein, putative, expressedFRQ1 no original description	CAM8 calmodulin 8
CLUSTER 2	signalling.calcium	potri.017g054900.1|pacid:26984548	Transcript	very weakly similar to (85.1) AT4G26470 | Symbols: | calcium ion binding | chr4:13371377-13372197 FORWARDvery weakly similar to (90.9) loc_os06g40720 12006.m08607 protein calcium ion binding protein, putative, expressed no original description	Calcium-binding EF-hand family protein
CLUSTER 2	signalling.calcium	potri.t121000.1|pacid:27003382	Transcript	weakly similar to ( 114) AT4G13440 | Symbols: | calcium-binding EF hand family protein | chr4:7810215-7810679 FORWARD no original description	Calcium-binding EF-hand family protein
CLUSTER 2	cell.cell death	potri.001g241200.1|pacid:27042656	Transcript	no original description	DCD (Development and Cell Death) domain protein
CLUSTER 2	development.late embryogenesis abundant	potri.014g090800.1|pacid:27032275	Transcript	weakly similar to ( 191) AT2G46140 | Symbols: | late embryogenesis abundant protein, putative / LEA protein, putative | chr2:18959163-18960362 FORWARDmoderately similar to ( 223) LEA14_GOSHI Late embryogenesis abundant protein Lea14-A - Gossypium hirsutum (Upland cotton)weakly similar to ( 185) loc_os01g12580 12001.m07872 protein late embryogenesis abundant protein Lea14-A, putative, expressedLEA…	Late embryogenesis abundant protein
CLUSTER 2	development.unspecified	potri.002g092900.1|pacid:27022046	Transcript	weakly similar to ( 127) AT1G78020 | Symbols: | senescence-associated protein-related | chr1:29338787-29339491 FORWARDvery weakly similar to (83.2) loc_os08g31510 12008.m07147 protein expressed proteinDUF581 no original description	Protein of unknown function (DUF581)
CLUSTER 2	development.unspecified	potri.004g203900.1|pacid:26992495	Transcript	moderately similar to ( 278) AT2G27550 | Symbols: ATC | ATC (ARABIDOPSIS THALIANA CENTRORADIALIS); phosphatidylethanolamine binding | chr2:11773417-11774509 FORWARDmoderately similar to ( 289) CET2_TOBAC CEN-like protein 2 - Nicotiana tabacum (Common tobacco)moderately similar to ( 279) loc_os12g05590 12012.m04552 protein RCN3 - Rice Centroradialis-like1 homogous to Arabidopsis TFL1 gene, express…	ATC centroradialis
CLUSTER 2	development.unspecified	potri.009g165100.1|pacid:26985794	Transcript	moderately similar to ( 285) AT2G27550 | Symbols: ATC | ATC (ARABIDOPSIS THALIANA CENTRORADIALIS); phosphatidylethanolamine binding | chr2:11773417-11774509 FORWARDmoderately similar to ( 296) CET2_TOBAC CEN-like protein 2 - Nicotiana tabacum (Common tobacco)moderately similar to ( 280) loc_os12g05590 12012.m04552 protein RCN3 - Rice Centroradialis-like1 homogous to Arabidopsis TFL1 gene, express…	ATC centroradialis
CLUSTER 2	development.unspecified	potri.013g092400.1|pacid:26994493	Transcript	moderately similar to ( 412) AT4G10350 | Symbols: ANAC070 | ANAC070 (Arabidopsis NAC domain containing protein 70); transcription factor | chr4:6415287-6416829 REVERSEmoderately similar to ( 244) NAC76_ORYSA NAC domain-containing protein 76 (ONAC076) - Oryza sativa (Rice)moderately similar to ( 249) loc_os06g04090 12006.m05140 protein NAM protein, putative, expressedNAM no original description	NAC070 NAC domain containing protein 70
CLUSTER 2	development.unspecified	potri.014g108500.1|pacid:27032030	Transcript	moderately similar to ( 340) AT3G30340 | Symbols: | nodulin MtN21 family protein | chr3:11956626-11958969 FORWARDmoderately similar to ( 281) loc_os06g01966 12006.m31783 protein nodulin protein, putative, expressed no original description	nodulin MtN21 /EamA-like transporter family protein
CLUSTER 2	development.unspecified	potri.015g074300.1|pacid:27018235	Transcript	moderately similar to ( 262) AT5G62850 | Symbols: AtVEX1 | AtVEX1 (VEGETATIVE CELL EXPRESSED1) | chr5:25230204-25231527 REVERSEmoderately similar to ( 234) loc_os01g42090 12001.m10476 protein seven-transmembrane-domain protein 1, putative, expressed no original description	Nodulin MtN3 family protein
CLUSTER 2	transport.NDP-sugars at the ER	potri.014g077500.1|pacid:27032142	Transcript	highly similar to ( 536) AT1G12600 | Symbols: | FUNCTIONS IN: molecular_function unknown; INVOLVED IN: biological_process unknown; LOCATED IN: cellular_component unknown; EXPRESSED IN: leaf whorl, petal, male gametophyte, flower, pollen tube; EXPRESSED DURING: L mature pollen stage, 4 anthesis, petal differentiation and expansion stage; CONTAINS InterPro DOMAIN/s: UAA transporter (InterPro:IPR013…	UDP-N-acetylglucosamine (UAA) transporter family
CLUSTER 2	transport.metal	potri.002g080500.1|pacid:27020176	Transcript	highly similar to ( 572) AT1G80830 | Symbols: NRAMP1, PMIT1, ATNRAMP1 | NRAMP1 (NATURAL RESISTANCE-ASSOCIATED MACROPHAGE PROTEIN 1); inorganic anion transmembrane transporter/ manganese ion transmembrane transporter/ metal ion transmembrane transporter | chr1:30373066-30375644 REVERSEhighly similar to ( 716) loc_os07g15370 12007.m05981 protein metal transporter Nramp6, putative, expressedNramp PR…	ATNRAMP1,NRAMP1,PMIT1 natural resistance-associated macrophage protein 1
CLUSTER 2	transport.sugars	potri.014g136600.1|pacid:27033670	Transcript	highly similar to ( 619) AT2G48020 | Symbols: | sugar transporter, putative | chr2:19644441-19647007 FORWARDweakly similar to ( 140) STC_RICCO Sugar carrier protein C - Ricinus communis (Castor bean)moderately similar to ( 494) loc_os11g42430 12011.m08079 protein solute carrier family 2, facilitated glucose transporter member 8, putative, expressedSugar_tr xylE no original description	Major facilitator superfamily protein
CLUSTER 2	transport.nitrate	potri.015g081300.1|pacid:27018952	Transcript	highly similar to ( 674) AT1G12940 | Symbols: ATNRT2.5 | ATNRT2.5 (nitrate transporter2.5); nitrate transmembrane transporter | chr1:4416405-4418337 FORWARDhighly similar to ( 621) loc_os01g50820 12001.m11263 protein nitrate transporter, putative, expressedNarK no original description	ATNRT2.5,NRT2.5 nitrate transporter2.5
CLUSTER 2	transport.nitrate	potri.015g081500.1|pacid:27018523	Transcript	highly similar to ( 657) AT1G12940 | Symbols: ATNRT2.5 | ATNRT2.5 (nitrate transporter2.5); nitrate transmembrane transporter | chr1:4416405-4418337 FORWARDhighly similar to ( 605) loc_os01g50820 12001.m11263 protein nitrate transporter, putative, expressedNarK no original description	ATNRT2.5,NRT2.5 nitrate transporter2.5
CLUSTER 2	transport.ammonium	potri.t000600.1|pacid:26988915	Transcript	highly similar to ( 540) AT2G38290 | Symbols: ATAMT2, AMT2;1 | ATAMT2 (AMMONIUM TRANSPORTER 2); ammonium transmembrane transporter/ high affinity secondary active ammonium transmembrane transporter | chr2:16039672-16042291 REVERSEhighly similar to ( 637) loc_os01g65000 12001.m12614 protein ammonium transporter 2, putative, expressedAmtB PRK10666 Ammonium_transp no original description	AMT2,AMT2;1,ATAMT2 ammonium transporter 2
CLUSTER 2	transport.phosphate	potri.006g035100.1|pacid:27004384	Transcript	weakly similar to ( 154) AT2G03240 | Symbols: | LOCATED IN: integral to membrane; EXPRESSED IN: 18 plant structures; EXPRESSED DURING: 10 growth stages; CONTAINS InterPro DOMAIN/s: SPX, N-terminal (InterPro:IPR004331), EXS, C-terminal (InterPro:IPR004342); BEST Arabidopsis thaliana protein match is: unknown protein (TAIR:AT1G14040.1); Has 764 Blast hits to 738 proteins in 146 species: Archae - 0;…	EXS (ERD1/XPR1/SYG1) family protein
CLUSTER 2	transport.metabolite transporters at the mitochondrial membrane	potri.004g007800.1|pacid:26989295	Transcript	weakly similar to ( 111) AT1G62280 | Symbols: SLAH1 | SLAH1 (SLAC1 HOMOLOGUE 1); transporter | chr1:23007309-23008540 REVERSEvery weakly similar to (85.1) loc_os01g14520 12001.m08056 protein inner membrane transport protein, putative, expressed no original description	SLAH1 SLAC1 homologue 1
CLUSTER 2	not assigned.unknown	potri.001g008100.1|pacid:27048164	Transcript	no original description
CLUSTER 2	not assigned.unknown	potri.001g037600.1|pacid:27041587	Transcript	no original description
CLUSTER 2	not assigned.unknown	potri.001g050500.1|pacid:27048555	Transcript	no original description
CLUSTER 2	not assigned.unknown	potri.001g093000.1|pacid:27043130	Transcript	weakly similar to ( 147) AT1G64355 | Symbols: | unknown protein | chr1:23886152-23886764 FORWARDweakly similar to ( 134) loc_os05g49650 12005.m09035 protein expressed protein no original description
CLUSTER 2	not assigned.unknown	potri.001g098400.1|pacid:27040635	Transcript	weakly similar to ( 200) AT5G41590 | Symbols: | unknown protein | chr5:16632221-16633896 REVERSEweakly similar to ( 131) loc_os05g40630 12005.m08239 protein expressed proteinDUF567 no original description
CLUSTER 2	not assigned.unknown	potri.001g100400.1|pacid:27041348	Transcript	no original description
CLUSTER 2	not assigned.unknown	potri.001g112800.1|pacid:27043397	Transcript	moderately similar to ( 210) AT1G62981 | Symbols: | unknown protein | chr1:23333793-23334824 FORWARDweakly similar to ( 120) loc_os12g02550 12012.m04256 protein expressed proteinDUF1191 no original description
CLUSTER 2	not assigned.unknown	potri.001g238200.1|pacid:27044335	Transcript	no original description
CLUSTER 2	not assigned.unknown	potri.001g307000.1|pacid:27046434	Transcript	moderately similar to ( 215) CBPR_HEVBR Citrate-binding protein precursor - Hevea brasiliensis (Para rubber tree)moderately similar to ( 217) loc_os12g07310 12012.m04720 protein citrate-binding protein precursor, putative, expressedAlginate_lyase2 no original description
CLUSTER 2	not assigned.unknown	potri.001g320100.1|pacid:27046737	Transcript	no original description
CLUSTER 2	not assigned.unknown	potri.001g323700.1|pacid:27047963	Transcript	DUF588 no original description
CLUSTER 2	not assigned.unknown	potri.001g356600.1|pacid:27042467	Transcript	weakly similar to ( 118) AT5G55110 | Symbols: | stigma-specific Stig1 family protein | chr5:22367870-22368361 FORWARDStig1 no original description
CLUSTER 2	not assigned.unknown	potri.001g379300.1|pacid:27042981	Transcript	no original description
CLUSTER 2	not assigned.unknown	potri.002g021200.1|pacid:27020943	Transcript	no original description
CLUSTER 2	not assigned.unknown	potri.002g034300.1|pacid:27024417	Transcript	no original description
CLUSTER 2	not assigned.unknown	potri.002g060000.1|pacid:27021727	Transcript	no original description
CLUSTER 2	not assigned.unknown	potri.002g063600.1|pacid:27022193	Transcript	no original description
CLUSTER 2	not assigned.unknown	potri.002g102500.4|pacid:27021985	Transcript	weakly similar to ( 194) AT4G24380 | Symbols: | unknown protein | chr4:12612554-12613310 FORWARDweakly similar to ( 165) loc_os04g37710 12004.m08760 protein expressed protein no original description
CLUSTER 2	not assigned.unknown	potri.002g127000.1|pacid:27024419	Transcript	no original description
CLUSTER 2	not assigned.unknown	potri.002g174600.1|pacid:27023063	Transcript	highly similar to ( 526) AT4G00910 | Symbols: | unknown protein | chr4:389370-391287 REVERSEmoderately similar to ( 483) loc_os02g45160 12002.m09555 protein ALMT1, putative, expressedUPF0005 no original description
CLUSTER 2	not assigned.unknown	potri.002g177800.1|pacid:27021066	Transcript	no original description
CLUSTER 2	not assigned.unknown	potri.002g251000.1|pacid:27024479	Transcript	no original description
CLUSTER 2	not assigned.unknown	potri.003g013600.1|pacid:26998890	Transcript	no original description
CLUSTER 2	not assigned.unknown	potri.003g057900.1|pacid:26998819	Transcript	no original description
CLUSTER 2	not assigned.unknown	potri.003g073900.1|pacid:26999530	Transcript	no original description
CLUSTER 2	not assigned.unknown	potri.003g110200.1|pacid:27000120	Transcript	no original description
CLUSTER 2	not assigned.unknown	potri.003g143300.1|pacid:26999482	Transcript	no original description
CLUSTER 2	not assigned.unknown	potri.003g153600.1|pacid:26998654	Transcript	no original description
CLUSTER 2	not assigned.unknown	potri.003g165100.1|pacid:27000009	Transcript	no original description
CLUSTER 2	not assigned.unknown	potri.003g204200.1|pacid:26998693	Transcript	no original description
CLUSTER 2	not assigned.unknown	potri.004g001400.1|pacid:26989712	Transcript	moderately similar to ( 205) AT1G62420 | Symbols: | unknown protein | chr1:23102937-23104604 REVERSEweakly similar to ( 142) loc_os01g65740 12001.m12683 protein plant-specific domain TIGR01615 family proteinDUF506 no original description
CLUSTER 2	not assigned.unknown	potri.004g003700.1|pacid:26989418	Transcript	no original description
CLUSTER 2	not assigned.unknown	potri.004g027700.1|pacid:26992883	Transcript	no original description
CLUSTER 2	not assigned.unknown	potri.004g037300.1|pacid:26989858	Transcript	no original description
CLUSTER 2	not assigned.unknown	potri.004g039200.1|pacid:26989215	Transcript	no original description
CLUSTER 2	not assigned.unknown	potri.004g191100.1|pacid:26990221	Transcript	no original description
CLUSTER 2	not assigned.unknown	potri.005g032500.1|pacid:27028250	Transcript	no original description
CLUSTER 2	not assigned.unknown	potri.005g039200.1|pacid:27030409	Transcript	no original description
CLUSTER 2	not assigned.unknown	potri.005g049700.1|pacid:27028872	Transcript	no original description
CLUSTER 2	not assigned.unknown	potri.005g081100.1|pacid:27028172	Transcript	no original description
CLUSTER 2	not assigned.unknown	potri.005g081400.1|pacid:27029275	Transcript	no original description
CLUSTER 2	not assigned.unknown	potri.005g119600.1|pacid:27028937	Transcript	no original description
CLUSTER 2	not assigned.unknown	potri.005g150600.1|pacid:27030313	Transcript	no original description
CLUSTER 2	not assigned.unknown	potri.005g184800.1|pacid:27030270	Transcript	no original description
CLUSTER 2	not assigned.unknown	potri.005g208500.1|pacid:27031424	Transcript	moderately similar to ( 228) AT4G17970 | Symbols: | unknown protein | chr4:9975482-9977722 FORWARDmoderately similar to ( 257) loc_os10g42180 12010.m06973 protein ALMT1, putative, expressedUPF0005 no original description
CLUSTER 2	not assigned.unknown	potri.005g249000.1|pacid:27029061	Transcript	weakly similar to ( 140) AT2G17080 | Symbols: | unknown protein | chr2:7433326-7434117 REVERSEvery weakly similar to (84.0) loc_os11g06100 12011.m04807 protein conserved hypothetical proteinDUF241 no original description
CLUSTER 2	not assigned.unknown	potri.005g249500.1|pacid:27028422	Transcript	moderately similar to ( 274) AT1G76240 | Symbols: | unknown protein | chr1:28602949-28603875 REVERSEweakly similar to ( 115) loc_os06g50980 12006.m09622 protein conserved hypothetical proteinDUF241 no original description
CLUSTER 2	not assigned.unknown	potri.006g105600.1|pacid:27006026	Transcript	no original description
CLUSTER 2	not assigned.unknown	potri.006g208800.1|pacid:27003596	Transcript	weakly similar to ( 192) AT5G06200 | Symbols: | integral membrane family protein | chr5:1877333-1878116 FORWARDweakly similar to ( 115) loc_os06g12500 12006.m05966 protein plant integral membrane protein TIGR01569 containing protein, expressedDUF588 no original description
CLUSTER 2	not assigned.unknown	potri.007g026600.1|pacid:27014846	Transcript	no original description
CLUSTER 2	not assigned.unknown	potri.007g086400.1|pacid:27015409	Transcript	no original description
CLUSTER 2	not assigned.unknown	potri.009g001200.1|pacid:26986561	Transcript	no original description
CLUSTER 2	not assigned.unknown	potri.009g048300.1|pacid:26987611	Transcript	no original description
CLUSTER 2	not assigned.unknown	potri.009g048400.1|pacid:26986896	Transcript	no original description
CLUSTER 2	not assigned.unknown	potri.010g023700.1|pacid:26980686	Transcript	no original description
CLUSTER 2	not assigned.unknown	potri.010g066300.1|pacid:26981674	Transcript	no original description
CLUSTER 2	not assigned.unknown	potri.010g133500.1|pacid:26979674	Transcript	moderately similar to ( 306) AT1G13480 | Symbols: | unknown protein | chr1:4622783-4624043 REVERSEmoderately similar to ( 265) loc_os08g31910 12008.m07185 protein expressed proteinDUF1262 no original description
CLUSTER 2	not assigned.unknown	potri.010g147200.1|pacid:26982040	Transcript	no original description
CLUSTER 2	not assigned.unknown	potri.011g096800.1|pacid:27000991	Transcript	no original description
CLUSTER 2	not assigned.unknown	potri.012g080700.1|pacid:27049473	Transcript	no original description
CLUSTER 2	not assigned.unknown	potri.012g092200.1|pacid:27050978	Transcript	weakly similar to ( 138) AT1G14870 | Symbols: | FUNCTIONS IN: molecular_function unknown; INVOLVED IN: response to oxidative stress; LOCATED IN: plasma membrane; EXPRESSED IN: callus; CONTAINS InterPro DOMAIN/s: EGF-type aspartate/asparagine hydroxylation conserved site (InterPro:IPR000152), Protein of unknown function Cys-rich (InterPro:IPR006461); BEST Arabidopsis thaliana protein match is: unk…
CLUSTER 2	not assigned.unknown	potri.012g102100.1|pacid:27049069	Transcript	no original description
CLUSTER 2	not assigned.unknown	potri.012g120800.1|pacid:27049171	Transcript	no original description
CLUSTER 2	not assigned.unknown	potri.012g138200.1|pacid:27050304	Transcript	no original description
CLUSTER 2	not assigned.unknown	potri.013g002900.1|pacid:26993974	Transcript	no original description
CLUSTER 2	not assigned.unknown	potri.013g045500.1|pacid:26995088	Transcript	no original description
CLUSTER 2	not assigned.unknown	potri.013g148300.1|pacid:26994328	Transcript	no original description
CLUSTER 2	not assigned.unknown	potri.014g020800.1|pacid:27032494	Transcript	no original description
CLUSTER 2	not assigned.unknown	potri.014g028400.1|pacid:27032811	Transcript	no original description
CLUSTER 2	not assigned.unknown	potri.014g048800.1|pacid:27035374	Transcript	no original description
CLUSTER 2	not assigned.unknown	potri.014g053400.1|pacid:27035233	Transcript	no original description
CLUSTER 2	not assigned.unknown	potri.014g142500.1|pacid:27032634	Transcript	no original description
CLUSTER 2	not assigned.unknown	potri.014g144200.1|pacid:27032813	Transcript	no original description
CLUSTER 2	not assigned.unknown	potri.014g176100.1|pacid:27032309	Transcript	very weakly similar to (81.6) AT3G47630 | Symbols: | FUNCTIONS IN: molecular_function unknown; INVOLVED IN: biological_process unknown; EXPRESSED IN: 21 plant structures; EXPRESSED DURING: 13 growth stages; CONTAINS InterPro DOMAIN/s: Mitochondrial matrix Mmp37 (InterPro:IPR015222); Has 226 Blast hits to 226 proteins in 115 species: Archae - 0; Bacteria - 0; Metazoa - 96; Fungi - 92; Plants - 19;…
CLUSTER 2	not assigned.unknown	potri.015g010500.1|pacid:27019309	Transcript	no original description
CLUSTER 2	not assigned.unknown	potri.015g037900.1|pacid:27017893	Transcript	no original description
CLUSTER 2	not assigned.unknown	potri.016g075400.1|pacid:27012698	Transcript	weakly similar to ( 173) AT5G06200 | Symbols: | integral membrane family protein | chr5:1877333-1878116 FORWARDweakly similar to ( 111) loc_os06g12500 12006.m05966 protein plant integral membrane protein TIGR01569 containing protein, expressedDUF588 no original description
CLUSTER 2	not assigned.unknown	potri.016g098300.1|pacid:27014015	Transcript	no original description
CLUSTER 2	not assigned.unknown	potri.016g113900.1|pacid:27012348	Transcript	no original description
CLUSTER 2	not assigned.unknown	potri.017g085900.1|pacid:26983662	Transcript	no original description
CLUSTER 2	not assigned.unknown	potri.017g097900.1|pacid:26985416	Transcript	no original description
CLUSTER 2	not assigned.unknown	potri.017g102200.1|pacid:26984045	Transcript	no original description
CLUSTER 2	not assigned.unknown	potri.017g107400.1|pacid:26983478	Transcript	no original description
CLUSTER 2	not assigned.unknown	potri.018g139200.1|pacid:27009298	Transcript	no original description
CLUSTER 2	not assigned.unknown	potri.019g037500.1|pacid:27025305	Transcript	no original description
CLUSTER 2	not assigned.unknown	potri.019g069100.1|pacid:27024883	Transcript	no original description
CLUSTER 2	not assigned.unknown	potri.019g126200.1|pacid:27025896	Transcript	weakly similar to ( 106) AT5G58410 | Symbols: | binding / protein binding / zinc ion binding | chr5:23609663-23617343 FORWARDvery weakly similar to (98.6) loc_os01g74610 12001.m13486 protein zinc finger, C3HC4 type family protein, expressed no original description
CLUSTER 2	not assigned.unknown	potri.t015000.1|pacid:27051430	Transcript	no original description
CLUSTER 2	not assigned.unknown	potri.t031100.1|pacid:27027202	Transcript	no original description
CLUSTER 2	not assigned.unknown	potri.t043600.1|pacid:26993176	Transcript	no original description
CLUSTER 2	not assigned.unknown	potri.t054600.1|pacid:27014211	Transcript	no original description
CLUSTER 2	not assigned.unknown	potri.t101300.1|pacid:26993246	Transcript	no original description
CLUSTER 2	not assigned.unknown	potri.t177300.1|pacid:26989021	Transcript	weakly similar to ( 135) AT1G25141 | Symbols: | UDP-3-0-acyl N-acetylglucosamine deacetylase family protein / F-box protein-related | chr1:8817678-8822328 FORWARDvery weakly similar to (99.4) loc_os03g12320 12003.m35100 protein UDP-3-O- N-acetylglucosamine deacetylase, putative, expressedLpxC LpxC no original description
CLUSTER 2	not assigned.unknown	potri.001g405600.1|pacid:27047760	Transcript	no original description'
CLUSTER 2	PS.photorespiration.hydroxypyruvate reductase	potri.003g119000.1|pacid:26998478	Transcript	moderately similar to ( 327) AT2G45630 | Symbols: | oxidoreductase family protein | chr2:18796000-18797089 FORWARDvery weakly similar to (88.6) FDH1_ORYSA Formate dehydrogenase 1, mitochondrial precursor (EC 1.2.1.2) (NAD-dependent formate dehydrogenase 1) (FDH 1) - Oryza sativa (Rice)moderately similar to ( 273) loc_os04g01674 12004.m05484 protein glyoxylate reductase, putative, expressedLdhA 2-…	D-isomer specific 2-hydroxyacid dehydrogenase family protein
CLUSTER 2	cell wall.pectin*esterases.PME	potri.004g156300.1|pacid:26990400	Transcript	moderately similar to ( 444) AT2G21610 | Symbols: PE11, ATPE11 | pectinesterase family protein | chr2:9245161-9247025 REVERSEweakly similar to ( 176) PME3_CITSI Pectinesterase-3 precursor (EC 3.1.1.11) (Pectin methylesterase 3) (PE 3) - Citrus sinensis (Sweet orange)moderately similar to ( 341) loc_os01g44340 12001.m10690 protein pectinesterase-3 precursor, putative, expressedPectinesterase PemB …	ATPE11,PE11 pectinesterase 11
CLUSTER 2	lipid metabolism.lipid degradation.lipases.triacylglycerol lipase	potri.007g044500.2|pacid:27015816	Transcript	highly similar to ( 503) AT5G67050 | Symbols: | lipase class 3 family protein | chr5:26759482-26761165 REVERSEmoderately similar to ( 453) loc_os02g52830 12002.m10313 protein triacylglycerol lipase, putative, expressedLipase_3 Lipase_3 Lipase no original description	alpha/beta-Hydrolases superfamily protein
CLUSTER 2	lipid metabolism.lipid degradation.lysophospholipases.phospholipase D	potri.018g131200.1|pacid:27010266	Transcript	nearly identical (1228) AT1G52570 | Symbols: PLDALPHA2 | PLDALPHA2 (phosphlipase d alpha 2); phospholipase D | chr1:19583940-19586551 REVERSEnearly identical (1278) PLDA1_RICCO Phospholipase D alpha 1 precursor (EC 3.1.4.4) (PLD 1) (Choline phosphatase 1) (Phosphatidylcholine-hydrolyzing phospholipase D 1) - Ricinus communis (Castor bean)nearly identical (1260) loc_os01g07760 12001.m42610 protein…	PLDALPHA2 phospholipase D alpha 2
CLUSTER 2	mino acid metabolism.degradation.aspartate family.lysine.lysine decarboxylase	potri.009g060300.1|pacid:26985857	Transcript	moderately similar to ( 305) AT2G28305 | Symbols: | unknown protein | chr2:12081186-12084307 FORWARDmoderately similar to ( 301) loc_os04g43840 12004.m09343 protein carboxy-lyase, putative, expressedLysine_decarbox COG1611 no original description	LOG1 Putative lysine decarboxylase family protein
CLUSTER 2	secondary metabolism.isoprenoids.terpenoids	potri.019g016900.1|pacid:27026994	Transcript	moderately similar to ( 465) AT5G23960 | Symbols: ATTPS21, TPS21 | TPS21 (TERPENE SYNTHASE 21); (-)-E-beta-caryophyllene synthase/ alpha-humulene synthase | chr5:8092969-8095128 FORWARDhighly similar to ( 549) CASS_RICCO Casbene synthase, chloroplast precursor (EC 4.2.3.8) - Ricinus communis (Castor bean)moderately similar to ( 332) loc_os08g04500 12008.m04593 protein terpene synthase 6, putative…	TPS21 terpene synthase 21
CLUSTER 2	secondary metabolism.isoprenoids.terpenoids	potri.t112600.1|pacid:27051373	Transcript	moderately similar to ( 456) AT5G23960 | Symbols: ATTPS21, TPS21 | TPS21 (TERPENE SYNTHASE 21); (-)-E-beta-caryophyllene synthase/ alpha-humulene synthase | chr5:8092969-8095128 FORWARDmoderately similar to ( 499) CASS_RICCO Casbene synthase, chloroplast precursor (EC 4.2.3.8) - Ricinus communis (Castor bean)moderately similar to ( 313) loc_os08g04500 12008.m04593 protein terpene synthase 6, puta…	TPS21 terpene synthase 21
CLUSTER 2	secondary metabolism.phenylpropanoids.lignin biosynthesis.4CL	potri.001g055700.1|pacid:27041056	Transcript	highly similar to ( 772) AT1G62940 | Symbols: ACOS5 | ACOS5 (ACYL-COA SYNTHETASE 5); 4-coumarate-CoA ligase/ long-chain-fatty-acid-CoA ligase/ medium-chain-fatty-acid-CoA ligase | chr1:23310554-23312747 FORWARDmoderately similar to ( 362) 4CL1_PETCR 4-coumarate--CoA ligase 1 (EC 6.2.1.12) (4CL 1) (4-coumaroyl-CoA synthase 1) - Petroselinum crispum (Parsley) (Petroselinum hortense)highly similar t…	ACOS5 acyl-CoA synthetase 5
CLUSTER 2	secondary metabolism.flavonoids.dihydroflavonols.dihydroflavonol 4-reductase	potri.001g093300.1|pacid:27042295	Transcript	weakly similar to ( 169) AT4G27250 | Symbols: | dihydroflavonol 4-reductase family / dihydrokaempferol 4-reductase family | chr4:13642803-13644425 REVERSEweakly similar to ( 177) DFRA_PETHY Dihydroflavonol-4-reductase (EC 1.1.1.219) (DFR) (Dihydrokaempferol 4-reductase) - Petunia hybrida (Petunia)moderately similar to ( 303) loc_os07g40986 12007.m79911 protein dihydroflavonol-4-reductase, putativ…	BEN1 NAD(P)-binding Rossmann-fold superfamily protein
CLUSTER 2	hormone metabolism.ethylene.synthesis-degradation	potri.001g176200.1|pacid:27046573	Transcript	moderately similar to ( 490) AT1G52820 | Symbols: | 2-oxoglutarate-dependent dioxygenase, putative | chr1:19669216-19670321 FORWARDvery weakly similar to ( 100) GAO1A_WHEAT Gibberellin 20 oxidase 1-A (EC 1.14.11.-) (Gibberellin C-20 oxidase 1-B) (GA 20-oxidase 1-A) (Ta20ox1A) (TaGA20ox1-A) - Triticum aestivum (Wheat)moderately similar to ( 213) loc_os08g32170 12008.m07211 protein oxidoreductase, …	2-oxoglutarate (2OG) and Fe(II)-dependent oxygenase superfamily protein
CLUSTER 2	hormone metabolism.ethylene.signal transduction	potri.t133300.1|pacid:27000345	Transcript	weakly similar to ( 135) AT2G28580 | Symbols: | unknown protein | chr2:12244885-12248270 FORWARDvery weakly similar to (96.3) loc_os01g38120 12001.m10097 protein conserved hypothetical proteinDUF247 no original description	Plant protein of unknown function (DUF247)
CLUSTER 2	hormone metabolism.gibberelin.synthesis-degradation	potri.001g175800.1|pacid:27043587	Transcript	moderately similar to ( 332) AT1G52820 | Symbols: | 2-oxoglutarate-dependent dioxygenase, putative | chr1:19669216-19670321 FORWARDweakly similar to ( 173) loc_os08g32170 12008.m07211 protein oxidoreductase, putative, expressedPcbC no original description	2-oxoglutarate (2OG) and Fe(II)-dependent oxygenase superfamily protein
CLUSTER 2	hormone metabolism.gibberelin.synthesis-degradation	potri.001g175900.1|pacid:27045897	Transcript	moderately similar to ( 261) AT1G52820 | Symbols: | 2-oxoglutarate-dependent dioxygenase, putative | chr1:19669216-19670321 FORWARDweakly similar to ( 134) loc_os08g32170 12008.m07211 protein oxidoreductase, putative, expressed no original description	2-oxoglutarate (2OG) and Fe(II)-dependent oxygenase superfamily protein
CLUSTER 2	hormone metabolism.gibberelin.synthesis-degradation	potri.001g176000.1|pacid:27047513	Transcript	moderately similar to ( 460) AT1G52790 | Symbols: | oxidoreductase, 2OG-Fe(II) oxygenase family protein | chr1:19662194-19663301 REVERSEvery weakly similar to (85.5) GAO1B_WHEAT Gibberellin 20 oxidase 1-B (EC 1.14.11.-) (Gibberellin C-20 oxidase 1-B) (GA 20-oxidase 1-B) (Ta20ox1B) (TaGA20ox1-B) - Triticum aestivum (Wheat)weakly similar to ( 179) loc_os08g32170 12008.m07211 protein oxidoreductase,…	2-oxoglutarate (2OG) and Fe(II)-dependent oxygenase superfamily protein
CLUSTER 2	hormone metabolism.gibberelin.synthesis-degradation	potri.001g176100.1|pacid:27047081	Transcript	moderately similar to ( 284) AT1G52800 | Symbols: | oxidoreductase, 2OG-Fe(II) oxygenase family protein | chr1:19664044-19665362 FORWARDvery weakly similar to (96.3) GAO1D_WHEAT Gibberellin 20 oxidase 1-D (EC 1.14.11.-) (Gibberellin C-20 oxidase 1-D) (GA 20-oxidase 1-D) (Ta20ox1D) (TaGA20ox1-D) (Protein Wga20) - Triticum aestivum (Wheat)weakly similar to ( 150) loc_os08g32170 12008.m07211 protein…	2-oxoglutarate (2OG) and Fe(II)-dependent oxygenase superfamily protein
CLUSTER 2	hormone metabolism.jasmonate.synthesis-degradation.allene oxidase synthase	potri.009g109700.1|pacid:26986689	Transcript	moderately similar to ( 468) AT5G42650 | Symbols: AOS, CYP74A, DDE2 | AOS (ALLENE OXIDE SYNTHASE); allene oxide synthase/ hydro-lyase/ oxygen binding | chr5:17097803-17099359 REVERSEmoderately similar to ( 450) C74A1_ORYSA Cytochrome P450 74A1, chloroplast precursor (EC 4.2.1.92) (Allene oxide synthase 1) (Hydroperoxide dehydrase 1) - Oryza sativa (Rice)moderately similar to ( 450) loc_os03g55800…	AOS,CYP74A,DDE2 allene oxide synthase
CLUSTER 2	hormone metabolism.salicylic acid.synthesis-degradation	potri.005g045900.1|pacid:27027442	Transcript	moderately similar to ( 267) AT1G19640 | Symbols: JMT | JMT (JASMONIC ACID CARBOXYL METHYLTRANSFERASE); jasmonate O-methyltransferase | chr1:6789166-6791708 REVERSEmoderately similar to ( 244) BAMT_ANTMA Benzoate carboxyl methyltransferase (EC 2.1.1.-) (S-adenosyl-L-methionine:benzoic acid carboxyl methyltransferase) - Antirrhinum majus (Garden snapdragon)moderately similar to ( 293) loc_os01g506…	JMT jasmonic acid carboxyl methyltransferase
CLUSTER 2	hormone metabolism.salicylic acid.synthesis-degradation	potri.008g136200.1|pacid:27039249	Transcript	moderately similar to ( 308) AT1G68040 | Symbols: | S-adenosyl-L-methionine:carboxyl methyltransferase family protein | chr1:25502876-25505224 FORWARDweakly similar to ( 171) BAMT_ANTMA Benzoate carboxyl methyltransferase (EC 2.1.1.-) (S-adenosyl-L-methionine:benzoic acid carboxyl methyltransferase) - Antirrhinum majus (Garden snapdragon)weakly similar to ( 180) loc_os04g57080 12004.m10594 protei…	S-adenosyl-L-methionine-dependent methyltransferases superfamily protein
CLUSTER 2	stress.biotic.signalling.MLO-like	potri.006g129700.1|pacid:27005120	Transcript	moderately similar to ( 494) AT3G45290 | Symbols: MLO3, ATMLO3 | MLO3 (MILDEW RESISTANCE LOCUS O 3); calmodulin binding | chr3:16617586-16621352 FORWARDmoderately similar to ( 423) MLOH1_HORVU MLO protein homolog 1 - Hordeum vulgare (Barley)moderately similar to ( 424) loc_os03g03700 12003.m101174 protein MLO protein homolog 1, putative, expressedMlo no original description	ATMLO12,MLO12 Seven transmembrane MLO family protein
CLUSTER 2	stress.biotic.PR-proteins	potri.001g096500.1|pacid:27047118	Transcript	moderately similar to ( 213) AT1G64160 | Symbols: | disease resistance-responsive family protein / dirigent family protein | chr1:23814063-23814611 FORWARDweakly similar to ( 162) DR206_PEA Disease resistance response protein 206 - Pisum sativum (Garden pea)weakly similar to ( 164) loc_os07g44930 12007.m08714 protein disease resistance response protein 206, putative, expressedDirigent no original…	Disease resistance-responsive (dirigent-like protein) family protein
CLUSTER 2	stress.biotic.PR-proteins	potri.003g134400.1|pacid:26997512	Transcript	weakly similar to ( 181) AT1G64160 | Symbols: | disease resistance-responsive family protein / dirigent family protein | chr1:23814063-23814611 FORWARDmoderately similar to ( 202) DR206_PEA Disease resistance response protein 206 - Pisum sativum (Garden pea)weakly similar to ( 158) loc_os07g44930 12007.m08714 protein disease resistance response protein 206, putative, expressedDirigent no original…	Disease resistance-responsive (dirigent-like protein) family protein
CLUSTER 2	stress.biotic.PR-proteins	potri.016g060700.1|pacid:27013069	Transcript	weakly similar to ( 173) AT1G65870 | Symbols: | disease resistance-responsive family protein | chr1:24503624-24504193 FORWARDweakly similar to ( 164) loc_os11g07830 12011.m04979 protein dirigent-like protein pDIR9, putative, expressedDirigent no original description	Disease resistance-responsive (dirigent-like protein) family protein
CLUSTER 2	stress.abiotic.unspecified	potri.008g109000.1|pacid:27039100	Transcript	weakly similar to ( 185) AT1G69080 | Symbols: | universal stress protein (USP) family protein | chr1:25972132-25973243 REVERSEweakly similar to ( 190) loc_os12g31710 12012.m06980 protein universal stress protein family protein, expressed no original description	Adenine nucleotide alpha hydrolases-like superfamily protein
CLUSTER 2	RNA.processing.RNA helicase	potri.005g047300.1|pacid:27029731	Transcript	weakly similar to ( 134) AT5G51280 | Symbols: | DEAD-box protein abstrakt, putative | chr5:20841456-20843645 FORWARDvery weakly similar to (90.1) loc_os02g05660 12002.m05914 protein ATP-dependent RNA helicase DDX41, putative, expressed no original description	DEAD-box protein abstrakt, putative
CLUSTER 2	RNA.regulation of transcription.CCAAT box binding factor family, HAP3	potri.008g210300.1|pacid:27037216	Transcript	weakly similar to ( 163) AT2G47810 | Symbols: NF-YB5 | NF-YB5 (NUCLEAR FACTOR Y, SUBUNIT B5); transcription factor | chr2:19582938-19583420 REVERSEweakly similar to ( 141) NFYB2_ORYSA Nuclear transcription factor Y subunit B-2 (OsNF-YB-2) (Transcriptional activator HAP3A) - Oryza sativa (Rice)weakly similar to ( 167) loc_os01g70890 12001.m13134 protein nuclear transcription factor Y subunit B-5, …	NF-YB5 nuclear factor Y, subunit B5
CLUSTER 2	RNA.regulation of transcription.MYB domain transcription factor family	potri.001g235500.2|pacid:27045471	Transcript	weakly similar to ( 150) AT3G46130 | Symbols: MYB111, PFG3, ATMYB48-2 | MYB111 (MYB DOMAIN PROTEIN 111); DNA binding / transcription factor | chr3:16945465-16946376 FORWARDweakly similar to ( 123) MYBA1_ORYSA Myb-related protein MYBAS1 - Oryza sativa (Rice)weakly similar to ( 123) loc_os11g47460 12011.m28697 protein MYB59, putative, expressed no original description	ATMYB48-1,ATMYB48-2,ATMYB48-3,MYB48 myb domain protein 48
CLUSTER 2	RNA.regulation of transcription.MYB domain transcription factor family	potri.001g235500.3|pacid:27045472	Transcript	weakly similar to ( 115) AT3G46130 | Symbols: MYB111, PFG3, ATMYB48-2 | MYB111 (MYB DOMAIN PROTEIN 111); DNA binding / transcription factor | chr3:16945465-16946376 FORWARDvery weakly similar to (93.6) MYBA1_ORYSA Myb-related protein MYBAS1 - Oryza sativa (Rice)very weakly similar to (94.0) loc_os11g47460 12011.m28697 protein MYB59, putative, expressed no original description	ATMYB48-1,ATMYB48-2,ATMYB48-3,MYB48 myb domain protein 48
CLUSTER 2	RNA.regulation of transcription.MYB domain transcription factor family	potri.003g155700.1|pacid:26998873	Transcript	moderately similar to ( 237) AT3G12720 | Symbols: ATY53, ATMYB67 | ATMYB67 (MYB DOMAIN PROTEIN 67); DNA binding / transcription factor | chr3:4043407-4044522 REVERSEweakly similar to ( 196) MYB3_HORVU Myb-related protein Hv33 - Hordeum vulgare (Barley)moderately similar to ( 245) loc_os07g31470 12007.m07416 protein MYB transcription factor, putative, expressed no original description	ATMYB67,ATY53,MYB67 myb domain protein 67
CLUSTER 2	RNA.regulation of transcription.MYB domain transcription factor family	potri.015g067700.1|pacid:27019663	Transcript	moderately similar to ( 213) AT3G28470 | Symbols: ATMYB35, TDF1 | TDF1 (DEFECTIVE IN MERISTEM DEVELOPMENT AND FUNCTION 1); DNA binding / transcription factor | chr3:10674579-10675724 REVERSEweakly similar to ( 179) MYB38_MAIZE Myb-related protein Zm38 - Zea mays (Maize)moderately similar to ( 221) loc_os03g18480 12003.m07271 protein DNA binding protein, putative, expressed no original description	Duplicated homeodomain-like superfamily protein
CLUSTER 2	RNA.regulation of transcription.MYB-related transcription factor family	potri.002g035000.1|pacid:27022378	Transcript	weakly similar to ( 116) AT1G75250 | Symbols: ATRL6 | ATRL6 (ARABIDOPSIS RAD-LIKE 6); transcription factor | chr1:28244463-28245453 REVERSEvery weakly similar to (89.4) loc_os01g44390 12001.m10695 protein DNA binding protein, putative, expressed no original description	ATRL6,RL6,RSM3 RAD-like 6
CLUSTER 2	RNA.regulation of transcription.AP2/EREBP, APETALA2/Ethylene-responsive element binding protein family	potri.006g163400.1|pacid:27007362	Transcript	weakly similar to ( 149) AT5G11590 | Symbols: TINY2 | TINY2 (TINY2); DNA binding / transcription factor | chr5:3727789-3728499 REVERSEweakly similar to ( 133) loc_os10g41130 12010.m06878 protein DREB-like protein, putative, expressedAP2 AP2 no original description	Integrase-type DNA-binding superfamily protein
CLUSTER 2	RNA.regulation of transcription.AP2/EREBP, APETALA2/Ethylene-responsive element binding protein family	potri.009g101900.1|pacid:26986350	Transcript	weakly similar to ( 115) AT4G34410 | Symbols: RRTF1 | RRTF1 ({REDOX RESPONSIVE TRANSCRIPTION FACTOR 1); DNA binding / transcription factor | chr4:16451992-16452798 FORWARDvery weakly similar to (80.5) ERF4_NICSY Ethylene-responsive transcription factor 4 (Ethylene-responsive element-binding factor 4 homolog) (EREBP-3) (NsERF3) - Nicotiana sylvestris (Wood tobacco)very weakly similar to (98.6) loc…	RRTF1 redox responsive transcription factor 1
CLUSTER 2	RNA.regulation of transcription.AP2/EREBP, APETALA2/Ethylene-responsive element binding protein family	potri.009g147700.1|pacid:26987200	Transcript	weakly similar to ( 130) AT4G25490 | Symbols: CBF1, DREB1B, ATCBF1 | CBF1 (C-REPEAT/DRE BINDING FACTOR 1); DNA binding / transcription activator/ transcription factor | chr4:13021921-13022562 REVERSEweakly similar to ( 130) loc_os01g73770 12001.m13404 protein dehydration-responsive element-binding protein 1C, putative, expressedAP2 AP2 no original description	ATCBF1,CBF1,DREB1B C-repeat/DRE binding factor 1
CLUSTER 2	RNA.regulation of transcription.WRKY domain transcription factor family	potri.001g044500.3|pacid:27045824	Transcript	weakly similar to ( 162) AT1G80840 | Symbols: WRKY40, ATWRKY40 | WRKY40; transcription factor | chr1:30383834-30385356 FORWARDweakly similar to ( 116) loc_os02g08440 12002.m33348 protein OsWRKY71 - Superfamily of rice TFs having WRKY and zinc finger domains, expressed no original description	ATWRKY40,WRKY40 WRKY DNA-binding protein 40
CLUSTER 2	RNA.regulation of transcription.ARR	potri.002g082200.1|pacid:27021268	Transcript	weakly similar to ( 164) AT3G57040 | Symbols: ARR9, ATRR4 | ARR9 (RESPONSE REGULATOR 9); transcription regulator/ two-component response regulator | chr3:21110059-21111228 FORWARDweakly similar to ( 170) loc_os12g04500 12012.m04444 protein OsRR10 - Rice type-A response regulator, expressedREC no original description	ARR9,ATRR4 response regulator 9
CLUSTER 2	RNA.regulation of transcription.bHLH,Basic Helix-Loop-Helix family	potri.001g083500.1|pacid:27045056	Transcript	moderately similar to ( 206) AT4G00870 | Symbols: | basic helix-loop-helix (bHLH) family protein | chr4:362230-363639 REVERSEweakly similar to ( 164) loc_os10g42430 12010.m06996 protein transcription factor MYC7E, putative, expressed no original description	ATMYC2,JAI1,JIN1,MYC2,RD22BP1,ZBF1 Basic helix-loop-helix (bHLH) DNA-binding family protein
CLUSTER 2	protein.postranslational modification.kinase.receptor like cytoplasmatic kinase VII	potri.012g132200.1|pacid:27050997	Transcript	moderately similar to ( 330) AT1G52540 | Symbols: | protein kinase, putative | chr1:19570298-19571884 REVERSEmoderately similar to ( 221) NORK_PEA Nodulation receptor kinase precursor (EC 2.7.11.1) - Pisum sativum (Garden pea)moderately similar to ( 470) loc_os09g36180 12009.m06567 protein glycosyl transferase family 8 proteinTyrKc S_TKc S_TKc Pkinase PTKc Pkinase_Tyr PTKc_Srm_Brk PTKc_Src_like P…	Protein kinase superfamily protein
CLUSTER 2	protein.postranslational modification.kinase.receptor like cytoplasmatic kinase VII	potri.016g140100.1|pacid:27013350	Transcript	highly similar to ( 851) AT1G06840 | Symbols: | leucine-rich repeat transmembrane protein kinase, putative | chr1:2097854-2103479 REVERSEmoderately similar to ( 205) NORK_PEA Nodulation receptor kinase precursor (EC 2.7.11.1) - Pisum sativum (Garden pea)highly similar to ( 799) loc_os01g72990 12001.m150451 protein ATP binding protein, putative, expressedTyrKc PTKc Pkinase_Tyr S_TKc S_TKc Pkinase …	Leucine-rich repeat protein kinase family protein
CLUSTER 2	minor CHO metabolism.raffinose family.galactinol synthases.putative	potri.t155800.1|pacid:27051470	Transcript	moderately similar to ( 389) AT1G56600 | Symbols: AtGolS2 | AtGolS2 (Arabidopsis thaliana galactinol synthase 2); transferase, transferring glycosyl groups / transferase, transferring hexosyl groups | chr1:21207620-21209291 FORWARDmoderately similar to ( 370) loc_os03g20120 12003.m07424 protein galactinol synthase 3, putative, expressedGlyco_transf_8 no original description	AtGolS2,GolS2 galactinol synthase 2
CLUSTER 2	signalling.receptor kinases.leucine rich repeat XI	potri.013g048800.1|pacid:26994308	Transcript	nearly identical (1293) AT1G08590 | Symbols: | CLAVATA1 receptor kinase (CLV1) | chr1:2718859-2721948 FORWARDmoderately similar to ( 464) RPK1_IPONI Receptor-like protein kinase precursor (EC 2.7.11.1) - Ipomoea nil (Japanese morning glory) (Pharbitis nil)nearly identical (1179) loc_os03g05140 12003.m06038 protein receptor-like protein kinase 5 precursor, putative, expressedS_TKc S_TKc Pkinase Pk…	Leucine-rich receptor-like protein kinase family protein
CLUSTER 2	signalling.receptor kinases.wheat LRK10 like	potri.t065400.1|pacid:27014164	Transcript	weakly similar to ( 122) AT1G66920 | Symbols: | serine/threonine protein kinase, putative | chr1:24965410-24967432 REVERSE no original description	Protein kinase family protein
CLUSTER 3	cell wall.modification	potri.018g098200.1|pacid:27009838	Transcript	weakly similar to ( 116) AT4G30380 | Symbols: EXLB2 | EXLB2 (EXPANSIN-LIKE B2 PRECURSOR) | chr4:14860486-14860994 FORWARDweakly similar to ( 135) loc_os06g47360 12006.m09262 protein blight-associated protein p12 precursor, putative, expressed no original description	Barwin-related endoglucanase
CLUSTER 3	lipid metabolism.lipid transfer proteins etc	potri.016g135400.1|pacid:27013307	Transcript	very weakly similar to (90.5) AT5G59320 | Symbols: LTP3 | LTP3 (LIPID TRANSFER PROTEIN 3); lipid binding | chr5:23929051-23929492 FORWARDvery weakly similar to (92.8) NLTP_MALDO Nonspecific lipid-transfer protein precursor (LTP) (Allergen Mal d 3) - Malus domestica (Apple) (Malus sylvestris)nsLTP1 no original description	LP1,LTP1 lipid transfer protein 1
CLUSTER 3	amino acid metabolism	potri.018g025500.1|pacid:27009627	Transcript	highly similar to ( 592) AT5G25320 | Symbols: | ACT domain-containing protein | chr5:8787403-8789530 REVERSEmoderately similar to ( 375) loc_os02g34990 12002.m33394 protein amino acid binding protein, putative, expressedACT_ACR_1 ACT_ACR_3 ACT_ACR_2 ACT_ACR_4 no original description	CT-like superfamily protein
CLUSTER 3	secondary metabolism.phenylpropanoids	potri.001g388900.1|pacid:27044511	Transcript	highly similar to ( 542) PPO_MALDO Polyphenol oxidase, chloroplast precursor (EC 1.10.3.1) (PPO) (Catechol oxidase) - Malus domestica (Apple) (Malus sylvestris)moderately similar to ( 449) loc_os04g53300 12004.m10221 protein polyphenol oxidase II, chloroplast precursor, putative, expressedTyrosinase no original description
CLUSTER 3	secondary metabolism.phenylpropanoids	potri.004g017600.1|pacid:26991331	Transcript	moderately similar to ( 251) AT3G26040 | Symbols: | transferase family protein | chr3:9519741-9521069 FORWARDvery weakly similar to (86.3) HCBT2_DIACA Anthranilate N-benzoyltransferase protein 2 (EC 2.3.1.144) (Anthranilate N-hydroxycinnamoyl/benzoyltransferase 2) - Dianthus caryophyllus (Carnation) (Clove pink)weakly similar to ( 111) loc_os02g39850 12002.m09071 protein anthranilate N-benzoyltra…	HXXXD-type acyl-transferase family protein
CLUSTER 3	stress.biotic	potri.004g182000.1|pacid:26992659	Transcript	moderately similar to ( 441) AT3G12500 | Symbols: ATHCHIB, PR3, PR-3, CHI-B, B-CHI | ATHCHIB (ARABIDOPSIS THALIANA BASIC CHITINASE); chitinase | chr3:3962501-3963945 REVERSEmoderately similar to ( 461) CHIT_PHAVU Endochitinase precursor (EC 3.2.1.14) - Phaseolus vulgaris (Kidney bean) (French bean)moderately similar to ( 397) loc_os06g51060 12006.m09629 protein basic endochitinase 1 precursor, pu…	B-CHI,CHI-B,HCHIB,PR-3,PR3 basic chitinase
CLUSTER 3	stress.biotic	potri.019g093800.1|pacid:27026773	Transcript	moderately similar to ( 357) AT3G54420 | Symbols: ATEP3, ATCHITIV, CHIV | ATEP3; chitinase | chr3:20145935-20147034 FORWARDmoderately similar to ( 341) CHI4_PHAVU Endochitinase PR4 precursor (EC 3.2.1.14) - Phaseolus vulgaris (Kidney bean) (French bean)moderately similar to ( 314) loc_os04g41680 12004.m09144 protein endochitinase A precursor, putative, expressedchitinase_glyco_hydro_19 Glyco_hydr…	CHIV,EP3 homolog of carrot EP3-3 chitinase
CLUSTER 3	stress.biotic	potri.t131500.1|pacid:26993234	Transcript	weakly similar to ( 192) AT2G14580 | Symbols: ATPRB1 | ATPRB1 | chr2:6225703-6226188 REVERSEweakly similar to ( 194) PRB1_TOBAC Basic form of pathogenesis-related protein 1 precursor (PRP 1) - Nicotiana tabacum (Common tobacco)weakly similar to ( 150) loc_os01g28500 12001.m43020 protein pathogenesis-related protein PRMS precursor, putative, expressedSCP SCP SCP no original description	,PRB1 basic pathogenesis-related protein 1
CLUSTER 3	misc.cytochrome P450	potri.007g083900.1|pacid:27015239	Transcript	moderately similar to ( 335) AT3G26330 | Symbols: CYP71B37 | CYP71B37; electron carrier/ heme binding / iron ion binding / monooxygenase/ oxygen binding | chr3:9646873-9648536 REVERSEmoderately similar to ( 322) C75A1_PETHY Flavonoid 3',5'-hydroxylase 1 (EC 1.14.13.88) (F3'5'H) (Cytochrome P450 75A1) (CYPLXXVA1) - Petunia hybrida (Petunia)moderately similar to ( 343) loc_os09g26970 12009.m05849 p…	cytochrome P450, family 71, subfamily B, polypeptide 37
CLUSTER 3	misc.cytochrome P450	potri.014g038100.1|pacid:27033618	Transcript	highly similar to ( 522) AT4G31940 | Symbols: CYP82C4 | CYP82C4; electron carrier/ heme binding / iron ion binding / monooxygenase/ oxygen binding | chr4:15452040-15453966 FORWARDhighly similar to ( 531) C82A4_SOYBN Cytochrome P450 82A4 (EC 1.14.-.-) (P450 CP9) - Glycine max (Soybean)moderately similar to ( 349) loc_os09g26960 12009.m05848 protein flavonoid 3-monooxygenase, putative, expressedp45…	CYP82C4 cytochrome P450, family 82, subfamily C, polypeptide 4
CLUSTER 3	misc.peroxidases	potri.001g011000.1|pacid:27046108	Transcript	moderately similar to ( 392) AT3G49120 | Symbols: ATPERX34, PERX34, PRXCB, ATPCB | PRXCB (PEROXIDASE CB); peroxidase | chr3:18207819-18210041 FORWARDmoderately similar to ( 341) PERX_TOBAC Lignin-forming anionic peroxidase precursor (EC 1.11.1.7) (TOPA) - Nicotiana tabacum (Common tobacco)moderately similar to ( 347) loc_os03g13200 12003.m06766 protein peroxidase 53 precursor, putative, expressed…	Peroxidase superfamily protein
CLUSTER 3	misc.peroxidases	potri.001g011300.1|pacid:27047980	Transcript	moderately similar to ( 398) AT3G49120 | Symbols: ATPERX34, PERX34, PRXCB, ATPCB | PRXCB (PEROXIDASE CB); peroxidase | chr3:18207819-18210041 FORWARDmoderately similar to ( 342) PERX_TOBAC Lignin-forming anionic peroxidase precursor (EC 1.11.1.7) (TOPA) - Nicotiana tabacum (Common tobacco)moderately similar to ( 344) loc_os03g13200 12003.m06766 protein peroxidase 53 precursor, putative, expressed…	,PERX34,PRX34,PRXCB peroxidase CB
CLUSTER 3	misc.peroxidases	potri.013g154400.1|pacid:26994125	Transcript	moderately similar to ( 320) AT5G05340 | Symbols: | peroxidase, putative | chr5:1579142-1580819 REVERSEmoderately similar to ( 386) PER1_ARAHY Cationic peroxidase 1 precursor (EC 1.11.1.7) (PNPC1) - Arachis hypogaea (Peanut)moderately similar to ( 357) loc_os04g55740 12004.m10465 protein peroxidase 2 precursor, putative, expressedsecretory_peroxidase plant_peroxidase peroxidase no original descri…	Peroxidase superfamily protein
CLUSTER 3	misc.peroxidases	potri.016g132900.1|pacid:27013315	Transcript	moderately similar to ( 337) AT5G58400 | Symbols: | peroxidase, putative | chr5:23605357-23606967 REVERSEmoderately similar to ( 363) PER1_ARAHY Cationic peroxidase 1 precursor (EC 1.11.1.7) (PNPC1) - Arachis hypogaea (Peanut)moderately similar to ( 352) loc_os03g22020 12003.m07605 protein peroxidase 52 precursor, putative, expressedsecretory_peroxidase plant_peroxidase peroxidase ascorbate_perox…	Peroxidase superfamily protein
CLUSTER 3	misc.myrosinases-lectin-jacalin	potri.001g391200.1|pacid:27046952	Transcript	moderately similar to ( 296) AT1G78860 | Symbols: | curculin-like (mannose-binding) lectin family protein | chr1:29646168-29647499 REVERSEmoderately similar to ( 370) EP1G_DAUCA Epidermis-specific secreted glycoprotein EP1 precursor (52/54 kDa medium protein) - Daucus carota (Carrot)weakly similar to ( 120) loc_os04g23640 12004.m07505 protein ATP binding protein, putative, expressedB_lectin B_lec…	D-mannose binding lectin protein with Apple-like carbohydrate-binding domain
CLUSTER 3	misc.invertase/pectin methylesterase inhibitor family protein	potri.001g119300.1|pacid:27043439	Transcript	weakly similar to ( 147) AT5G62360 | Symbols: | invertase/pectin methylesterase inhibitor family protein | chr5:25040699-25041310 FORWARDweakly similar to ( 144) 21KD_DAUCA 21 kDa protein precursor (1.2 protein) - Daucus carota (Carrot)very weakly similar to (86.3) loc_os06g49760 12006.m09500 protein ripening-related protein, putative, expressedPMEI no original description	Plant invertase/pectin methylesterase inhibitor superfamily protein
CLUSTER 3	misc.UDP glucosyl and glucoronyl transferases	potri.006g055600.1|pacid:27003682	Transcript	moderately similar to ( 442) AT4G15550 | Symbols: IAGLU | IAGLU (INDOLE-3-ACETATE BETA-D-GLUCOSYLTRANSFERASE); UDP-glycosyltransferase/ transferase, transferring glycosyl groups | chr4:8877877-8879301 REVERSEmoderately similar to ( 274) IAAG_MAIZE Indole-3-acetate beta-glucosyltransferase (EC 2.4.1.121) (IAA-Glu synthetase) ((Uridine 5'-diphosphate-glucose:indol-3-ylacetyl)-beta-D-glucosyl transf…	IAGLU indole-3-acetate beta-D-glucosyltransferase
CLUSTER 3	misc.UDP glucosyl and glucoronyl transferases	potri.009g095100.1|pacid:26987514	Transcript	moderately similar to ( 498) AT4G15480 | Symbols: UGT84A1 | UGT84A1; UDP-glycosyltransferase/ sinapate 1-glucosyltransferase/ transferase, transferring glycosyl groups | chr4:8849000-8850472 REVERSEmoderately similar to ( 207) IAAG_MAIZE Indole-3-acetate beta-glucosyltransferase (EC 2.4.1.121) (IAA-Glu synthetase) ((Uridine 5'-diphosphate-glucose:indol-3-ylacetyl)-beta-D-glucosyl transferase) - Z…	UGT84A1 UDP-Glycosyltransferase superfamily protein
CLUSTER 3	misc.UDP glucosyl and glucoronyl transferases	potri.009g099000.1|pacid:26987553	Transcript	highly similar to ( 578) AT4G34131 | Symbols: UGT73B3 | UGT73B3 (UDP-glucosyl transferase 73B3); UDP-glycosyltransferase/ abscisic acid glucosyltransferase/ quercetin 3-O-glucosyltransferase/ transferase, transferring hexosyl groups | chr4:16343268-16344713 REVERSEweakly similar to ( 197) ZOX_PHAVU Zeatin O-xylosyltransferase (EC 2.4.2.40) (Zeatin O-beta-D-xylosyltransferase) - Phaseolus vulgaris…	UGT73B3 UDP-glucosyl transferase 73B3
CLUSTER 3	misc.GCN5-related N-acetyltransferase	potri.008g037600.1|pacid:27037273	Transcript	moderately similar to ( 266) AT2G39020 | Symbols: | GCN5-related N-acetyltransferase (GNAT) family protein | chr2:16295392-16296102 FORWARDweakly similar to ( 158) THT11_TOBAC Tyramine N-feruloyltransferase 4/11 (EC 2.3.1.110) (Hydroxycinnamoyl-CoA: tyramine N-hydroxycinnamoyltransferase) - Nicotiana tabacum (Common tobacco)weakly similar to ( 188) loc_os03g05710 12003.m06093 protein N-acetyltran…	Acyl-CoA N-acyltransferases (NAT) superfamily protein
CLUSTER 3	misc.GDSL-motif lipase	potri.002g083700.1|pacid:27023816	Transcript	moderately similar to ( 392) AT3G26430 | Symbols: | GDSL-motif lipase/hydrolase family protein | chr3:9674419-9675889 FORWARDmoderately similar to ( 483) EST_HEVBR Esterase precursor (EC 3.1.1.-) (Early nodule-specific protein homolog) (Latex allergen Hev b 13) - Hevea brasiliensis (Para rubber tree)moderately similar to ( 382) loc_os07g39750 12007.m079815 protein alpha-L-fucosidase 2 precursor, …	GDSL-like Lipase/Acylhydrolase superfamily protein
CLUSTER 3	misc.GDSL-motif lipase	potri.002g083800.1|pacid:27022310	Transcript	moderately similar to ( 407) AT3G26430 | Symbols: | GDSL-motif lipase/hydrolase family protein | chr3:9674419-9675889 FORWARDhighly similar to ( 519) EST_HEVBR Esterase precursor (EC 3.1.1.-) (Early nodule-specific protein homolog) (Latex allergen Hev b 13) - Hevea brasiliensis (Para rubber tree)moderately similar to ( 404) loc_os07g39750 12007.m079815 protein alpha-L-fucosidase 2 precursor, puta…	GDSL-like Lipase/Acylhydrolase superfamily protein
CLUSTER 3	misc.nitrilases, *nitrile lyases, berberine bridge enzymes, reticuline oxidases, troponine reductases	potri.001g459100.1|pacid:27043723	Transcript	highly similar to ( 621) AT4G20800 | Symbols: | FAD-binding domain-containing protein | chr4:11139656-11141242 FORWARDmoderately similar to ( 451) loc_os06g35550 12006.m08092 protein retrotransposon protein, putative, Ty1-copia subclass, expressedFAD_binding_4 GlcD no original description	FAD-binding Berberine family protein
CLUSTER 3	misc.nitrilases, *nitrile lyases, berberine bridge enzymes, reticuline oxidases, troponine reductases	potri.001g461500.1|pacid:27042525	Transcript	highly similar to ( 518) AT4G20820 | Symbols: | FAD-binding domain-containing protein | chr4:11150160-11151758 FORWARDmoderately similar to ( 453) loc_os06g35550 12006.m08092 protein retrotransposon protein, putative, Ty1-copia subclass, expressedGlcD FAD_binding_4 no original description	FAD-binding Berberine family protein
CLUSTER 3	misc.nitrilases, *nitrile lyases, berberine bridge enzymes, reticuline oxidases, troponine reductases	potri.001g461700.1|pacid:27044446	Transcript	highly similar to ( 544) AT4G20820 | Symbols: | FAD-binding domain-containing protein | chr4:11150160-11151758 FORWARDmoderately similar to ( 469) loc_os06g35550 12006.m08092 protein retrotransposon protein, putative, Ty1-copia subclass, expressedGlcD FAD_binding_4 no original description	FAD-binding Berberine family protein
CLUSTER 3	misc.nitrilases, *nitrile lyases, berberine bridge enzymes, reticuline oxidases, troponine reductases	potri.001g461900.1|pacid:27043697	Transcript	highly similar to ( 543) AT4G20820 | Symbols: | FAD-binding domain-containing protein | chr4:11150160-11151758 FORWARDmoderately similar to ( 470) loc_os06g35550 12006.m08092 protein retrotransposon protein, putative, Ty1-copia subclass, expressedGlcD FAD_binding_4 no original description	FAD-binding Berberine family protein
CLUSTER 3	misc.nitrilases, *nitrile lyases, berberine bridge enzymes, reticuline oxidases, troponine reductases	potri.001g462300.1|pacid:27041751	Transcript	moderately similar to ( 316) AT1G30700 | Symbols: | FAD-binding domain-containing protein | chr1:10892623-10894437 FORWARDmoderately similar to ( 208) loc_os06g35550 12006.m08092 protein retrotransposon protein, putative, Ty1-copia subclass, expressed no original description	FAD-binding Berberine family protein
CLUSTER 3	misc.nitrilases, *nitrile lyases, berberine bridge enzymes, reticuline oxidases, troponine reductases	potri.001g463300.1|pacid:27043222	Transcript	highly similar to ( 615) AT1G30760 | Symbols: | FAD-binding domain-containing protein | chr1:10918321-10920441 FORWARDmoderately similar to ( 421) loc_os06g35700 12006.m08107 protein reticuline oxidase precursor, putative, expressedGlcD FAD_binding_4 no original description	EDA28,MEE23 FAD-binding Berberine family protein
CLUSTER 3	misc.nitrilases, *nitrile lyases, berberine bridge enzymes, reticuline oxidases, troponine reductases	potri.011g158100.1|pacid:27001933	Transcript	highly similar to ( 519) AT5G44440 | Symbols: | FAD-binding domain-containing protein | chr5:17910694-17912295 REVERSEmoderately similar to ( 478) loc_os06g35550 12006.m08092 protein retrotransposon protein, putative, Ty1-copia subclass, expressedGlcD FAD_binding_4 no original description	FAD-binding Berberine family protein
CLUSTER 3	misc.nitrilases, *nitrile lyases, berberine bridge enzymes, reticuline oxidases, troponine reductases	potri.011g162900.1|pacid:27001550	Transcript	highly similar to ( 525) AT4G20820 | Symbols: | FAD-binding domain-containing protein | chr4:11150160-11151758 FORWARDmoderately similar to ( 494) loc_os06g35550 12006.m08092 protein retrotransposon protein, putative, Ty1-copia subclass, expressedGlcD FAD_binding_4 no original description	FAD-binding Berberine family protein
CLUSTER 3	RNA.transcription	potri.009g133700.1|pacid:26987699	Transcript	moderately similar to ( 222) ATCG00170 | Symbols: RPOC2 | RNA polymerase beta' subunit-2 | chrC:15938-20068 REVERSEmoderately similar to ( 224) RPOC2_PANGI DNA-directed RNA polymerase beta'' chain (EC 2.7.7.6) (PEP) (Plastid-encoded RNA polymerase beta'' subunit) (RNA polymerase beta'' subunit) - Panax ginseng (Korean ginseng)weakly similar to ( 191) loc_osp1g00260 11562.m00015 protein RNA polyme…	DNA-directed RNA polymerase family protein
CLUSTER 3	RNA.RNA binding	potri.018g066900.2|pacid:27009173	Transcript	weakly similar to ( 150) AT2G26695 | Symbols: | binding / zinc ion binding | chr2:11365275-11365789 FORWARDweakly similar to ( 107) loc_os06g04920 12006.m31973 protein zinc finger protein, putative, expressed no original description	Ran BP2/NZF zinc finger-like superfamily protein
CLUSTER 3	signalling.G-proteins	potri.006g149900.1|pacid:27007756	Transcript	weakly similar to ( 163) AT2G26695 | Symbols: | binding / zinc ion binding | chr2:11365275-11365789 FORWARDweakly similar to ( 108) loc_os06g04920 12006.m31973 protein zinc finger protein, putative, expressed no original description	Ran BP2/NZF zinc finger-like superfamily protein
CLUSTER 3	cell.vesicle transport	potri.008g048700.1|pacid:27036896	Transcript	highly similar to ( 598) AT2G39380 | Symbols: ATEXO70H2 | ATEXO70H2 (EXOCYST SUBUNIT EXO70 FAMILY PROTEIN H2); protein binding | chr2:16447096-16449009 REVERSEmoderately similar to ( 270) loc_os04g31330 12004.m08235 protein protein binding protein, putative, expressedExo70 no original description	EXO70H2 exocyst subunit exo70 family protein H2
CLUSTER 3	development.storage proteins	potri.t095600.1|pacid:27051480'	Transcript	moderately similar to ( 305) AT2G26560 | Symbols: PLP2, PLA IIA, PLA2A | PLA2A (PHOSPHOLIPASE A 2A); lipase/ nutrient reservoir | chr2:11293912-11295708 REVERSEweakly similar to ( 193) PAT5_SOLTU Patatin T5 precursor (Potato tuber protein) - Solanum tuberosum (Potato)moderately similar to ( 289) loc_os09g28770 12009.m06028 protein patatin class 1 precursor, putative, expressedPatatin COG3621 no o…
CLUSTER 3	development.unspecified	potri.001g060900.1|pacid:27046474	Transcript	moderately similar to ( 272) AT5G13170 | Symbols: SAG29 | SAG29 (SENESCENCE-ASSOCIATED PROTEIN 29) | chr5:4181331-4183171 REVERSEmoderately similar to ( 248) loc_os11g31190 12011.m07024 protein mtN3-like protein, putative, expressedMtN3_slv no original description	SAG29 senescence-associated gene 29
CLUSTER 3	development.unspecified	potri.008g051500.1|pacid:27039988	Transcript	moderately similar to ( 447) AT2G39510 | Symbols: | nodulin MtN21 family protein | chr2:16491358-16493085 REVERSEmoderately similar to ( 360) loc_os10g14920 12010.m21851 protein nodulin-like protein, putative, expressed no original description	nodulin MtN21 /EamA-like transporter family protein
CLUSTER 3	transport.potassium	potri.008g225300.1|pacid:27039668	Transcript	very weakly similar to (86.3) AT4G13420 | Symbols: HAK5, ATHAK5 | HAK5 (HIGH AFFINITY K+ TRANSPORTER 5); potassium ion transmembrane transporter/ potassium:sodium symporter | chr4:7797038-7802174 REVERSEvery weakly similar to (89.7) HAK1_ORYSA Potassium transporter 1 (OsHAK1) - Oryza sativa (Rice)very weakly similar to (97.4) loc_os02g31910 12002.m33698 protein potassium transporter 1, putative, …	HAK5 high affinity K+ transporter 5
CLUSTER 3	transport.amino acids	potri.004g181000.1|pacid:26993114	Transcript	moderately similar to ( 382) AT1G47670 | Symbols: | amino acid transporter family protein | chr1:17536834-17539486 REVERSEmoderately similar to ( 426) loc_os04g47420 12004.m09687 protein expressed proteinAa_trans no original description	Transmembrane amino acid transporter family protein
CLUSTER 3	transport.sulphate	potri.002g049500.1|pacid:27023980	Transcript	highly similar to ( 995) AT3G51895 | Symbols: SULTR3;1, AST12 | SULTR3;1 (SULFATE TRANSPORTER 3;1); secondary active sulfate transmembrane transporter/ sulfate transmembrane transporter/ transporter | chr3:19251503-19255677 REVERSEmoderately similar to ( 359) NO70_SOYBN Early nodulin 70 - Glycine max (Soybean)highly similar to ( 917) loc_os03g06520 12003.m06170 protein sulfate transporter 3.1, pu…	SULTR3;1 sulfate transporter 3;1
CLUSTER 3	not assigned.unknown	potri.001g057600.1|pacid:27045788	Transcript	no original description
CLUSTER 3	not assigned.unknown	potri.001g097300.1|pacid:27047057	Transcript	moderately similar to ( 307) AT3G18440 | Symbols: AtALMT9 | AtALMT9 (aluminum-activated malate transporter 9); anion channel | chr3:6328181-6330652 FORWARDhighly similar to ( 652) loc_os01g12210 12001.m07836 protein ALMT1, putative, expressedUPF0005 no original description
CLUSTER 3	not assigned.unknown	potri.001g292200.1|pacid:27044574	Transcript	no original description
CLUSTER 3	not assigned.unknown	potri.001g324500.1|pacid:27041448	Transcript	weakly similar to ( 175) AT4G18930 | Symbols: | cyclic phosphodiesterase | chr4:10370797-10371885 FORWARDweakly similar to ( 171) loc_os05g44170 12005.m08543 protein cyclic phosphodiesterase, putative, expressedCPDase no original description
CLUSTER 3	not assigned.unknown	potri.001g376200.1|pacid:27043194	Transcript	no original description
CLUSTER 3	not assigned.unknown	potri.001g380300.1|pacid:27044590	Transcript	no original description
CLUSTER 3	not assigned.unknown	potri.002g074300.1|pacid:27024046	Transcript	weakly similar to ( 123) AT1G31130 | Symbols: | unknown protein | chr1:11114963-11115928 REVERSEweakly similar to ( 157) loc_os08g01590 12008.m080057 protein expressed protein no original description
CLUSTER 3	not assigned.unknown	potri.002g107500.1|pacid:27024351	Transcript	no original description
CLUSTER 3	not assigned.unknown	potri.003g061000.1|pacid:26996275	Transcript	no original description
CLUSTER 3	not assigned.unknown	potri.003g061100.1|pacid:26998254	Transcript	no original description
CLUSTER 3	not assigned.unknown	potri.003g061200.1|pacid:26996781	Transcript	no original description
CLUSTER 3	not assigned.unknown	potri.004g029700.1|pacid:26990907	Transcript	no original description
CLUSTER 3	not assigned.unknown	potri.004g088200.1|pacid:26992198	Transcript	weakly similar to ( 164) AT5G37840 | Symbols: | FUNCTIONS IN: molecular_function unknown; INVOLVED IN: biological_process unknown; LOCATED IN: cellular_component unknown; BEST Arabidopsis thaliana protein match is: PMI2 (plastid movement impaired 2) (TAIR:AT1G66480.1); Has 49 Blast hits to 49 proteins in 8 species: Archae - 0; Bacteria - 0; Metazoa - 0; Fungi - 0; Plants - 49; Viruses - 0; Other …
CLUSTER 3	not assigned.unknown	potri.005g099100.1|pacid:27027901	Transcript	no original description
CLUSTER 3	not assigned.unknown	potri.005g142900.1|pacid:27031682	Transcript	no original description
CLUSTER 3	not assigned.unknown	potri.005g252400.1|pacid:27028399	Transcript	no original description
CLUSTER 3	not assigned.unknown	potri.006g002300.1|pacid:27003943	Transcript	no original description
CLUSTER 3	not assigned.unknown	potri.006g002400.1|pacid:27007040	Transcript	no original description
CLUSTER 3	not assigned.unknown	potri.006g088700.1|pacid:27003825	Transcript	no original description
CLUSTER 3	not assigned.unknown	potri.006g212000.1|pacid:27003537	Transcript	no original description
CLUSTER 3	not assigned.unknown	potri.006g212200.1|pacid:27006678	Transcript	no original description
CLUSTER 3	not assigned.unknown	potri.007g049400.1|pacid:27016798	Transcript	no original description
CLUSTER 3	not assigned.unknown	potri.007g094400.1|pacid:27016266	Transcript	no original description
CLUSTER 3	not assigned.unknown	potri.007g111500.1|pacid:27016414	Transcript	Kunitz_legume STI STI no original description
CLUSTER 3	not assigned.unknown	potri.007g111800.1|pacid:27015462	Transcript	Kunitz_legume STI STI no original description
CLUSTER 3	not assigned.unknown	potri.008g220000.1|pacid:27039136	Transcript	very weakly similar to (87.4) ATMG00665 | Symbols: NAD5B, NAD5.2, NAD5 | Mitochondrial NADH dehydrogenase subunit 5. The gene is trans-spliced from three different pre-cursors, NAD5a, NAD5b and NAD5c. | chrM:190740-190761 REVERSEvery weakly similar to (87.8) NU5M_WHEAT NADH-ubiquinone oxidoreductase chain 5 (EC 1.6.5.3) (NADH dehydrogenase subunit 5) - Triticum aestivum (Wheat) no original descri…
CLUSTER 3	not assigned.unknown	potri.009g096100.1|pacid:26988724	Transcript	no original description
CLUSTER 3	not assigned.unknown	potri.010g024000.1|pacid:26979310	Transcript	weakly similar to ( 131) AT3G21400 | Symbols: | unknown protein | chr3:7534824-7536293 REVERSEvery weakly similar to ( 100) loc_os12g35550 12012.m07348 protein expressed protein no original description
CLUSTER 3	not assigned.unknown	potri.013g101000.1|pacid:26995178	Transcript	weakly similar to ( 133) AT4G24340 | Symbols: | phosphorylase family protein | chr4:12607475-12609148 FORWARDmoderately similar to ( 464) BSPB_POPDE Bark storage protein B precursor - Populus deltoides (Poplar)weakly similar to ( 164) loc_os06g02210 12006.m04955 protein bark storage protein A precursor, putative, expressed no original description
CLUSTER 3	not assigned.unknown	potri.013g156600.1|pacid:26995948	Transcript	no original description
CLUSTER 3	not assigned.unknown	potri.014g108800.1|pacid:27032566	Transcript	no original description
CLUSTER 3	not assigned.unknown	potri.014g108900.1|pacid:27032551	Transcript	no original description
CLUSTER 3	not assigned.unknown	potri.015g051300.1|pacid:27017474	Transcript	weakly similar to ( 123) ATMG00665 | Symbols: NAD5B, NAD5.2, NAD5 | Mitochondrial NADH dehydrogenase subunit 5. The gene is trans-spliced from three different pre-cursors, NAD5a, NAD5b and NAD5c. | chrM:190740-190761 REVERSEweakly similar to ( 125) NU5M_OENBE NADH-ubiquinone oxidoreductase chain 5 (EC 1.6.5.3) (NADH dehydrogenase subunit 5) - Oenothera bertiana (Bertero's evening primrose) no ori…
CLUSTER 3	not assigned.unknown	potri.016g078800.1|pacid:27011809	Transcript	no original description
CLUSTER 3	not assigned.unknown	potri.016g079000.1|pacid:27013043	Transcript	no original description
CLUSTER 3	not assigned.unknown	potri.016g079100.1|pacid:27011640	Transcript	no original description
CLUSTER 3	not assigned.unknown	potri.017g057200.1|pacid:26984600	Transcript	no original description
CLUSTER 3	not assigned.unknown	potri.017g136100.1|pacid:26983997	Transcript	no original description
CLUSTER 3	not assigned.unknown	potri.018g109000.1|pacid:27010876	Transcript	no original description
CLUSTER 3	not assigned.unknown	potri.019g006900.1|pacid:27026043	Transcript	STI STI Kunitz_legume no original description
CLUSTER 3	not assigned.unknown	potri.019g010900.1|pacid:27025726	Transcript	STI STI no original description
CLUSTER 3	not assigned.unknown	potri.019g011000.1|pacid:27025215	Transcript	STI STI Kunitz_legume no original description
CLUSTER 3	not assigned.unknown	potri.019g012400.1|pacid:27025840	Transcript	no original description
CLUSTER 3	not assigned.unknown	potri.019g012600.1|pacid:27026916	Transcript	no original description
CLUSTER 3	not assigned.unknown	potri.019g013000.1|pacid:27026681	Transcript	no original description
CLUSTER 3	not assigned.unknown	potri.019g017400.1|pacid:27026705	Transcript	no original description
CLUSTER 3	not assigned.unknown	potri.t005900.1|pacid:27003356	Transcript	no original description
CLUSTER 3	secondary metabolism.isoprenoids.terpenoids	potri.005g095500.1|pacid:27028433	Transcript	moderately similar to ( 402) AT5G23960 | Symbols: ATTPS21, TPS21 | TPS21 (TERPENE SYNTHASE 21); (-)-E-beta-caryophyllene synthase/ alpha-humulene synthase | chr5:8092969-8095128 FORWARDhighly similar to ( 504) DCS1_GOSHI (+)-delta-cadinene synthase (EC 4.2.3.13) (D-cadinene synthase) - Gossypium hirsutum (Upland cotton)moderately similar to ( 364) loc_os08g04500 12008.m04593 protein terpene synth…	TPS21 terpene synthase 21
CLUSTER 3	hormone metabolism.ethylene.synthesis-degradation	potri.005g185000.1|pacid:27031213	Transcript	weakly similar to ( 142) AT2G36690 | Symbols: | oxidoreductase, 2OG-Fe(II) oxygenase family protein | chr2:15379930-15381987 FORWARDweakly similar to ( 117) GAO1B_WHEAT Gibberellin 20 oxidase 1-B (EC 1.14.11.-) (Gibberellin C-20 oxidase 1-B) (GA 20-oxidase 1-B) (Ta20ox1B) (TaGA20ox1-B) - Triticum aestivum (Wheat)weakly similar to ( 182) loc_os08g37456 12008.m080186 protein flavonol synthase/flava…	2-oxoglutarate (2OG) and Fe(II)-dependent oxygenase superfamily protein
CLUSTER 3	hormone metabolism.ethylene.synthesis-degradation	potri.011g164200.1|pacid:27002787	Transcript	moderately similar to ( 305) AT4G10490 | Symbols: | oxidoreductase, 2OG-Fe(II) oxygenase family protein | chr4:6483900-6485179 FORWARDweakly similar to ( 164) GAOX1_ORYSA Gibberellin 20 oxidase 1 (EC 1.14.11.-) (Gibberellin C-20 oxidase 1) (GA 20-oxidase 1) (Os20ox) - Oryza sativa (Rice)moderately similar to ( 292) loc_os04g49210 12004.m09856 protein naringenin,2-oxoglutarate 3-dioxygenase, putat…	2-oxoglutarate (2OG) and Fe(II)-dependent oxygenase superfamily protein
CLUSTER 3	stress.biotic.PR-proteins	potri.001g214600.1|pacid:27047046	Transcript	weakly similar to ( 157) AT2G21100 | Symbols: | disease resistance-responsive protein-related / dirigent protein-related | chr2:9048687-9049336 REVERSEweakly similar to ( 138) loc_os11g07770 12011.m04973 protein dirigent-like protein pDIR12, putativeDirigent no original description	Disease resistance-responsive (dirigent-like protein) family protein
CLUSTER 3	stress.biotic.PR-proteins.proteinase inhibitors.trypsin inhibitor	potri.001g309900.1|pacid:27044211	Transcript	very weakly similar to (87.4) AT1G17860 | Symbols: | trypsin and protease inhibitor family protein / Kunitz family protein | chr1:6149343-6149933 FORWARDSTI STI Kunitz_legume no original description	Kunitz family trypsin and protease inhibitor protein
CLUSTER 3	stress.biotic.PR-proteins.proteinase inhibitors.trypsin inhibitor	potri.004g000400.1|pacid:26990657	Transcript	very weakly similar to (90.9) AT1G73260 | Symbols: | trypsin and protease inhibitor family protein / Kunitz family protein | chr1:27547410-27548057 REVERSEvery weakly similar to (83.2) IAAS_ORYSA Alpha-amylase/subtilisin inhibitor precursor (RASI) - Oryza sativa (Rice)very weakly similar to (83.2) loc_os04g44470 12004.m09406 protein alpha-amylase/subtilisin inhibitor, putative, expressedSTI STI K…	ATKTI1,KTI1 kunitz trypsin inhibitor 1
CLUSTER 3	stress.abiotic.unspecified	potri.004g179800.1|pacid:26990637	Transcript	moderately similar to ( 263) AT5G39130 | Symbols: | germin-like protein, putative | chr5:15665638-15666413 REVERSEmoderately similar to ( 209) GLP1_MESCR Germin-like protein precursor - Mesembryanthemum crystallinum (Common ice plant)moderately similar to ( 224) loc_os02g29000 12002.m08044 protein germin-like protein subfamily 1 member 11 precursor, putativeCupin_1 no original description	RmlC-like cupins superfamily protein
CLUSTER 3	stress.abiotic.unspecified	potri.004g179900.1|pacid:26992876	Transcript	moderately similar to ( 263) AT5G39130 | Symbols: | germin-like protein, putative | chr5:15665638-15666413 REVERSEmoderately similar to ( 209) GLP1_MESCR Germin-like protein precursor - Mesembryanthemum crystallinum (Common ice plant)moderately similar to ( 224) loc_os02g29000 12002.m08044 protein germin-like protein subfamily 1 member 11 precursor, putativeCupin_1 no original description	RmlC-like cupins superfamily protein
CLUSTER 3	stress.abiotic.unspecified	potri.013g051600.1|pacid:26994505	Transcript	moderately similar to ( 289) AT3G05950 | Symbols: | germin-like protein, putative | chr3:1781130-1781964 REVERSEmoderately similar to ( 225) GLP1_MESCR Germin-like protein precursor - Mesembryanthemum crystallinum (Common ice plant)moderately similar to ( 254) loc_os02g29000 12002.m08044 protein germin-like protein subfamily 1 member 11 precursor, putativeCupin_1 no original description	RmlC-like cupins superfamily protein
CLUSTER 3	stress.abiotic.unspecified	potri.013g051700.1|pacid:26993967	Transcript	moderately similar to ( 290) AT3G05950 | Symbols: | germin-like protein, putative | chr3:1781130-1781964 REVERSEmoderately similar to ( 226) GLP1_MESCR Germin-like protein precursor - Mesembryanthemum crystallinum (Common ice plant)moderately similar to ( 254) loc_os02g29000 12002.m08044 protein germin-like protein subfamily 1 member 11 precursor, putativeCupin_1 no original description	RmlC-like cupins superfamily protein
CLUSTER 3	stress.abiotic.unspecified	potri.013g064100.1|pacid:26995074	Transcript	moderately similar to ( 271) AT5G39130 | Symbols: | germin-like protein, putative | chr5:15665638-15666413 REVERSEmoderately similar to ( 230) GLP1_MESCR Germin-like protein precursor - Mesembryanthemum crystallinum (Common ice plant)moderately similar to ( 243) loc_os02g29000 12002.m08044 protein germin-like protein subfamily 1 member 11 precursor, putativeCupin_1 no original description	RmlC-like cupins superfamily protein
CLUSTER 3	stress.abiotic.unspecified	potri.013g141900.1|pacid:26993751	Transcript	moderately similar to ( 221) AT1G72610 | Symbols: GLP1, ATGER1, GER1 | GER1 (GERMIN-LIKE PROTEIN 1); oxalate oxidase | chr1:27339302-27339928 REVERSEmoderately similar to ( 233) AB19A_PRUPE Auxin-binding protein ABP19a precursor - Prunus persica (Peach)moderately similar to ( 213) loc_os08g35760 12008.m07565 protein auxin-binding protein ABP20 precursor, putative, expressedCupin_1 no original des…	GER1,GLP1 germin-like protein 1
CLUSTER 3	misc.beta 1,3 glucan hydrolases.glucan endo-1,3-beta-glucosidase	potri.016g057600.1|pacid:27012372	Transcript	moderately similar to ( 402) AT3G57270 | Symbols: BG1 | BG1 (BETA-1,3-GLUCANASE 1); catalytic/ cation binding / hydrolase, hydrolyzing O-glycosyl compounds | chr3:21191336-21193118 REVERSEmoderately similar to ( 420) E13B_PRUPE Glucan endo-1,3-beta-glucosidase, basic isoform precursor (EC 3.2.1.39) ((1->3)-beta-glucan endohydrolase) ((1->3)-beta-glucanase) (Beta-1,3-endoglucanase) (PpGns1) - Prun…	BG1 beta-1,3-glucanase 1
CLUSTER 3	RNA.processing.ribonucleases	potri.008g212100.1|pacid:27036949	Transcript	weakly similar to ( 176) PRS2_SOLTU Pathogenesis-related protein STH-2 - Solanum tuberosum (Potato)weakly similar to ( 113) loc_os03g18850 12003.m07305 protein pathogenesis-related protein 1, putative, expressedBet_v_I no original description	MLP423 MLP-like protein 423
CLUSTER 3	RNA.processing.ribonucleases	potri.016g046500.1|pacid:27011643	Transcript	weakly similar to ( 148) MAL12_MALDO Major allergen Mal d 1 (Mal d I) (AP15) - Malus domestica (Apple) (Malus sylvestris)very weakly similar to (84.3) loc_os03g18850 12003.m07305 protein pathogenesis-related protein 1, putative, expressedBet_v_I no original description	MLP423 MLP-like protein 423
CLUSTER 3	RNA.regulation of transcription.AP2/EREBP, APETALA2/Ethylene-responsive element binding protein family	potri.019g075600.1|pacid:27026959	Transcript	weakly similar to ( 141) AT1G33760 | Symbols: | AP2 domain-containing transcription factor, putative | chr1:12237944-12238498 FORWARDvery weakly similar to (99.8) loc_os04g36640 12004.m08704 protein dehydration-responsive element-binding protein 1D, putativeAP2 AP2 no original description	Integrase-type DNA-binding superfamily protein
CLUSTER 3	RNA.regulation of transcription.AS2,Lateral Organ Boundaries Gene Family	potri.010g200400.1|pacid:26981293	Transcript	weakly similar to ( 147) AT5G06080 | Symbols: LBD33 | LBD33 (LOB DOMAIN-CONTAINING PROTEIN 33) | chr5:1830796-1831427 REVERSEweakly similar to ( 147) loc_os08g44940 12008.m08465 protein LOB domain protein 16, putativeDUF260 no original description	LBD33 LOB domain-containing protein 33
CLUSTER 3	protein.synthesis.ribosomal protein.prokaryotic.chloroplast.30S subunit.S15	potri.001g116400.1|pacid:27043704	Transcript	very weakly similar to ( 100) ATCG01120 | Symbols: RPS15 | encodes a chloroplast ribosomal protein S15, a constituent of the small subunit of the ribosomal complex | chrC:123296-123562 REVERSEweakly similar to ( 102) RR15_VITVI Chloroplast 30S ribosomal protein S15 - Vitis vinifera (Grape)weakly similar to ( 119) loc_os12g10580 12012.m05040 protein ribulose bisphosphate carboxylase large chain pr…	chloroplast ribosomal protein S15
CLUSTER 3	protein.degradation.ubiquitin.ubiquitin	potri.007g122400.1|pacid:27015879	Transcript	weakly similar to ( 132) AT2G32350 | Symbols: | FUNCTIONS IN: molecular_function unknown; INVOLVED IN: protein modification process; LOCATED IN: cellular_component unknown; EXPRESSED IN: flower; EXPRESSED DURING: petal differentiation and expansion stage; CONTAINS InterPro DOMAIN/s: Ubiquitin (InterPro:IPR000626); BEST Arabidopsis thaliana protein match is: ubiquitin family protein (TAIR:AT4G0523…	Ubiquitin-like superfamily protein
CLUSTER 3	protein.degradation.ubiquitin.E3.SCF.FBOX	potri.017g058000.1|pacid:26984649	Transcript	weakly similar to ( 135) AT3G06240 | Symbols: | F-box family protein | chr3:1887336-1888619 FORWARDvery weakly similar to (92.8) loc_os12g06740 12012.m26845 protein F-box protein interaction domain containing protein, expressed no original description	F-box family protein
CLUSTER 3	protein.degradation.serine protease	potri.017g140600.1|pacid:26984782	Transcript	very weakly similar to (92.4) ATCG00670 | Symbols: CLPP1, PCLPP | Encodes the only ClpP (caseinolytic protease) encoded within the plastid genome. Contains a highly conserved catalytic triad of Ser-type proteases (Ser-His-Asp). Part of the 350 kDa chloroplast Clp complex. The name reflects nomenclature described in Adam et. al (2001). | chrC:69910-71882 REVERSEvery weakly similar to (97.4) CLPP_C…	plastid-encoded CLP P
CLUSTER 3	signalling.receptor kinases.leucine rich repeat XI	potri.006g058600.1|pacid:27003711	Transcript	moderately similar to ( 375) AT5G06860 | Symbols: PGIP1, ATPGIP1 | PGIP1 (POLYGALACTURONASE INHIBITING PROTEIN 1); protein binding | chr5:2132373-2133434 FORWARDmoderately similar to ( 263) PGIP3_PHAVU Polygalacturonase inhibitor 3 precursor (Polygalacturonase-inhibiting protein) (PGIP-2) (PGIP-3) - Phaseolus vulgaris (Kidney bean) (French bean)moderately similar to ( 233) loc_os05g01444 12005.m2…	PGIP1 polygalacturonase inhibiting protein 1
CLUSTER 3	signalling.receptor kinases.DUF 26	potri.001g391300.1|pacid:27041494	Transcript	moderately similar to ( 385) AT1G78850 | Symbols: | curculin-like (mannose-binding) lectin family protein | chr1:29642072-29643397 REVERSEmoderately similar to ( 383) EP1G_DAUCA Epidermis-specific secreted glycoprotein EP1 precursor (52/54 kDa medium protein) - Daucus carota (Carrot)weakly similar to ( 145) loc_os04g23760 12004.m07515 protein ATP binding protein, putativeB_lectin B_lectin B_lecti…	D-mannose binding lectin protein with Apple-like carbohydrate-binding domain
CLUSTER 3	signalling.receptor kinases.misc	potri.017g040200.1|pacid:26983511	Transcript	moderately similar to ( 219) AT3G22060 | Symbols: | receptor protein kinase-related | chr3:7771065-7772137 FORWARDweakly similar to ( 137) loc_os05g41370 12005.m08312 protein receptor-like protein kinase homolog RK20-1, putative, expressed no original description	Receptor-like protein kinase-related family protein
CLUSTER 3	signalling.receptor kinases.misc	potri.t101900.1|pacid:26993251	Transcript	weakly similar to ( 141) AT3G22060 | Symbols: | receptor protein kinase-related | chr3:7771065-7772137 FORWARDvery weakly similar to (90.5) loc_os05g41370 12005.m08312 protein receptor-like protein kinase homolog RK20-1, putative, expressed no original description	Receptor-like protein kinase-related family protein
CLUSTER 4	cell wall.modification	potri.014g066300.1|pacid:27034523	Transcript	moderately similar to ( 313) AT1G65680 | Symbols: ATEXPB2, EXPB2, ATHEXP BETA 1.4 | ATEXPB2 (ARABIDOPSIS THALIANA EXPANSIN B2) | chr1:24427266-24428399 FORWARDmoderately similar to ( 283) EXB18_ORYSA Expansin-B18 precursor (OsEXPB18) (Beta-expansin-18) (OsaEXPb1.15) - Oryza sativa (Rice)moderately similar to ( 283) loc_os05g15690 12005.m05977 protein beta-expansin 2 precursor, putative, expressed…	BETA 1.4,EXPB2 expansin B2
CLUSTER 4	metal handling.regulation	potri.006g215700.1|pacid:27005341	Transcript	moderately similar to ( 382) AT2G37330 | Symbols: ALS3 | ALS3 (ALUMINUM SENSITIVE 3) | chr2:15669190-15670172 FORWARDmoderately similar to ( 338) loc_os05g02750 12005.m04811 protein membrane protein, putative, expressedCOG0390 UPF0014 no original description	ALS3 aluminum sensitive 3
CLUSTER 4	stress.biotic	potri.009g083000.1|pacid:26986783	Transcript	weakly similar to ( 187) AT4G33720 | Symbols: | pathogenesis-related protein, putative | chr4:16182813-16183304 FORWARDweakly similar to ( 185) PR1B_TOBAC Pathogenesis-related protein 1B precursor (PR-1B) - Nicotiana tabacum (Common tobacco)weakly similar to ( 175) loc_os01g28500 12001.m43020 protein pathogenesis-related protein PRMS precursor, putative, expressedSCP SCP SCP no original descripti…	CAP (Cysteine-rich secretory proteins, Antigen 5, and Pathogenesis-related 1 protein) superfamily protein
CLUSTER 4	stress.biotic	potri.012g033900.1|pacid:27050419	Transcript	moderately similar to ( 363) AT5G24090 | Symbols: | acidic endochitinase (CHIB1) | chr5:8143805-8145153 REVERSEmoderately similar to ( 358) CHIT3_VITVI Acidic endochitinase precursor (EC 3.2.1.14) - Vitis vinifera (Grape)moderately similar to ( 329) loc_os07g19040 12007.m06343 protein acidic endochitinase precursor, putativeGlyco_hydro_18 no original description	ATCHIA,CHIA chitinase A
CLUSTER 4	stress.biotic	potri.013g041700.1|pacid:26995030	Transcript	moderately similar to ( 235) AT3G04720 | Symbols: PR4, HEL, PR-4 | PR4 (PATHOGENESIS-RELATED 4); chitin binding | chr3:1285691-1286531 REVERSEmoderately similar to ( 255) HEVE_HEVBR Pro-hevein precursor (Major hevein) [Contains: Hevein (Allergen Hev b 6); Win-like protein] - Hevea brasiliensis (Para rubber tree)weakly similar to ( 187) loc_os11g37950 12011.m07642 protein win2 precursor, putative,…	HEL,PR-4,PR4 pathogenesis-related 4
CLUSTER 4	stress.biotic	potri.013g041900.1|pacid:26994297	Transcript	moderately similar to ( 235) AT3G04720 | Symbols: PR4, HEL, PR-4 | PR4 (PATHOGENESIS-RELATED 4); chitin binding | chr3:1285691-1286531 REVERSEmoderately similar to ( 246) WIN2_SOLTU Wound-induced protein WIN2 precursor - Solanum tuberosum (Potato)weakly similar to ( 184) loc_os11g37950 12011.m07642 protein win2 precursor, putative, expressedBarwin no original description	HEL,PR-4,PR4 pathogenesis-related 4
CLUSTER 4	misc.UDP glucosyl and glucoronyl transferases	potri.001g303000.1|pacid:27044067	Transcript	highly similar to ( 570) AT4G34131 | Symbols: UGT73B3 | UGT73B3 (UDP-glucosyl transferase 73B3); UDP-glycosyltransferase/ abscisic acid glucosyltransferase/ quercetin 3-O-glucosyltransferase/ transferase, transferring hexosyl groups | chr4:16343268-16344713 REVERSEmoderately similar to ( 216) ZOX_PHAVU Zeatin O-xylosyltransferase (EC 2.4.2.40) (Zeatin O-beta-D-xylosyltransferase) - Phaseolus vulg…	UGT73B3 UDP-glucosyl transferase 73B3
CLUSTER 4	misc.UDP glucosyl and glucoronyl transferases	potri.001g389200.1|pacid:27040599	Transcript	moderately similar to ( 488) AT1G05680 | Symbols: | UDP-glucoronosyl/UDP-glucosyl transferase family protein | chr1:1703196-1704639 REVERSEmoderately similar to ( 345) IAAG_MAIZE Indole-3-acetate beta-glucosyltransferase (EC 2.4.1.121) (IAA-Glu synthetase) ((Uridine 5'-diphosphate-glucose:indol-3-ylacetyl)-beta-D-glucosyl transferase) - Zea mays (Maize)moderately similar to ( 383) loc_os09g34250 …	UGT74E2 Uridine diphosphate glycosyltransferase 74E2
CLUSTER 4	misc.UDP glucosyl and glucoronyl transferases	potri.014g146000.1|pacid:27032089	Transcript	moderately similar to ( 372) AT4G15550 | Symbols: IAGLU | IAGLU (INDOLE-3-ACETATE BETA-D-GLUCOSYLTRANSFERASE); UDP-glycosyltransferase/ transferase, transferring glycosyl groups | chr4:8877877-8879301 REVERSEmoderately similar to ( 215) IAAG_MAIZE Indole-3-acetate beta-glucosyltransferase (EC 2.4.1.121) (IAA-Glu synthetase) ((Uridine 5'-diphosphate-glucose:indol-3-ylacetyl)-beta-D-glucosyl transf…	IAGLU indole-3-acetate beta-D-glucosyltransferase
CLUSTER 4	misc.UDP glucosyl and glucoronyl transferases	potri.016g016200.1|pacid:27013287	Transcript	moderately similar to ( 400) AT3G21750 | Symbols: UGT71B1 | UGT71B1 (UDP-GLUCOSYL TRANSFERASE 71B1); UDP-glycosyltransferase/ quercetin 3-O-glucosyltransferase/ transferase, transferring glycosyl groups | chr3:7664565-7665986 FORWARDweakly similar to ( 131) UFOG_SOLME Anthocyanidin 3-O-glucosyltransferase (EC 2.4.1.115) (Flavonol 3-O-glucosyltransferase) (UDP-glucose flavonoid 3-O-glucosyltransfe…	UGT71B1 UDP-glucosyl transferase 71B1
CLUSTER 4	misc.short chain dehydrogenase/reductase (SDR)	potri.004g235600.1|pacid:26990904	Transcript	moderately similar to ( 280) AT3G61220 | Symbols: | short-chain dehydrogenase/reductase (SDR) family protein | chr3:22663025-22664316 FORWARDmoderately similar to ( 267) loc_os07g48640 12007.m079798 protein oxidoreductase, putative, expressedfabG FabG fabG fabG PRK12826 PRK12939 COG4221 PRK12429 DltE PRK06914 PRK06197 PRK07062 PRK06179 PRK12829 PRK07201 PRK06182 PRK06196 no original description	NAD(P)-binding Rossmann-fold superfamily protein
CLUSTER 4	misc.GDSL-motif lipase	potri.013g065100.1|pacid:26993577	Transcript	moderately similar to ( 369) AT5G40990 | Symbols: GLIP1 | GLIP1 (GDSL LIPASE1); carboxylesterase/ lipase | chr5:16418920-16420400 FORWARDweakly similar to ( 142) APG_BRANA Anter-specific proline-rich protein APG (Protein CEX) (Fragment) - Brassica napus (Rape)weakly similar to ( 192) loc_os09g04624 12009.m22215 protein anther-specific proline-rich protein APG precursor, putative, expressedSGNH_pl…	GLIP1 GDSL lipase 1
CLUSTER 4	misc.nitrilases, *nitrile lyases, berberine bridge enzymes, reticuline oxidases, troponine reductases	potri.011g162800.1|pacid:27000535	Transcript	highly similar to ( 539) AT5G44440 | Symbols: | FAD-binding domain-containing protein | chr5:17910694-17912295 REVERSEmoderately similar to ( 475) loc_os06g35550 12006.m08092 protein retrotransposon protein, putative, Ty1-copia subclass, expressedGlcD FAD_binding_4 no original description	FAD-binding Berberine family protein
CLUSTER 4	misc.nitrilases, *nitrile lyases, berberine bridge enzymes, reticuline oxidases, troponine reductases	potri.011g163000.1|pacid:27001525	Transcript	highly similar to ( 533) AT4G20820 | Symbols: | FAD-binding domain-containing protein | chr4:11150160-11151758 FORWARDmoderately similar to ( 485) loc_os06g35550 12006.m08092 protein retrotransposon protein, putative, Ty1-copia subclass, expressedGlcD FAD_binding_4 no original description	FAD-binding Berberine family protein
CLUSTER 4	misc.glutathione S transferases	potri.006g024200.1|pacid:27005208	Transcript	weakly similar to ( 184) AT3G09270 | Symbols: ATGSTU8 | ATGSTU8 (GLUTATHIONE S-TRANSFERASE TAU 8); glutathione transferase | chr3:2848407-2849226 REVERSEmoderately similar to ( 210) GSTX6_SOYBN Probable glutathione S-transferase (EC 2.5.1.18) (Heat shock protein 26A) (G2-4) - Glycine max (Soybean)weakly similar to ( 195) loc_os09g29200 12009.m06071 protein glutathione S-transferase, putative, exp…	GSTU8 glutathione S-transferase TAU 8
CLUSTER 4	misc.glutathione S transferases	potri.008g174900.1|pacid:27038986	Transcript	weakly similar to ( 181) AT2G29420 | Symbols: ATGSTU7, GST25 | ATGSTU7 (ARABIDOPSIS THALIANA GLUTATHIONE S-TRANSFERASE TAU 7); glutathione transferase | chr2:12618111-12618871 REVERSEweakly similar to ( 179) GSTX6_SOYBN Probable glutathione S-transferase (EC 2.5.1.18) (Heat shock protein 26A) (G2-4) - Glycine max (Soybean)weakly similar to ( 186) loc_os09g29200 12009.m06071 protein glutathione S-…	GSTU7 glutathione S-transferase tau 7
CLUSTER 4	misc.glutathione S transferases	potri.010g060900.2|pacid:26979077	Transcript	weakly similar to ( 170) AT2G29420 | Symbols: ATGSTU7, GST25 | ATGSTU7 (ARABIDOPSIS THALIANA GLUTATHIONE S-TRANSFERASE TAU 7); glutathione transferase | chr2:12618111-12618871 REVERSEweakly similar to ( 191) GSTX6_SOYBN Probable glutathione S-transferase (EC 2.5.1.18) (Heat shock protein 26A) (G2-4) - Glycine max (Soybean)weakly similar to ( 179) loc_os01g72140 12001.m13250 protein glutathione S-…	GSTU7 glutathione S-transferase tau 7
CLUSTER 4	misc.glutathione S transferases	potri.010g061100.1|pacid:26979696	Transcript	weakly similar to ( 167) AT2G29490 | Symbols: ATGSTU1, GST19 | ATGSTU1 (GLUTATHIONE S-TRANSFERASE TAU 1); glutathione transferase | chr2:12631593-12632360 REVERSEweakly similar to ( 199) GSTX6_SOYBN Probable glutathione S-transferase (EC 2.5.1.18) (Heat shock protein 26A) (G2-4) - Glycine max (Soybean)weakly similar to ( 179) loc_os01g72140 12001.m13250 protein glutathione S-transferase, putative…	GSTU7 glutathione S-transferase tau 7
CLUSTER 4	misc.glutathione S transferases	potri.010g061700.1|pacid:26978879	Transcript	weakly similar to ( 168) AT2G29420 | Symbols: ATGSTU7, GST25 | ATGSTU7 (ARABIDOPSIS THALIANA GLUTATHIONE S-TRANSFERASE TAU 7); glutathione transferase | chr2:12618111-12618871 REVERSEweakly similar to ( 188) GSTX6_SOYBN Probable glutathione S-transferase (EC 2.5.1.18) (Heat shock protein 26A) (G2-4) - Glycine max (Soybean)weakly similar to ( 167) loc_os03g39850 12003.m09068 protein glutathione S-…	GSTU7 glutathione S-transferase tau 7
CLUSTER 4	misc.glutathione S transferases	potri.t178900.1|pacid:26993156	Transcript	moderately similar to ( 278) AT1G17180 | Symbols: ATGSTU25 | ATGSTU25 (GLUTATHIONE S-TRANSFERASE TAU 25); glutathione transferase | chr1:5872208-5872958 FORWARDmoderately similar to ( 322) GSTXA_TOBAC Probable glutathione S-transferase parA (EC 2.5.1.18) (Auxin-regulated protein parA) (STR246C protein) - Nicotiana tabacum (Common tobacco)moderately similar to ( 242) loc_os09g20220 12009.m05229 pr…	GSTU25 glutathione S-transferase TAU 25
CLUSTER 4	misc.glutathione S transferases	potri.t181500.1|pacid:26983124	Transcript	weakly similar to ( 175) AT2G29420 | Symbols: ATGSTU7, GST25 | ATGSTU7 (ARABIDOPSIS THALIANA GLUTATHIONE S-TRANSFERASE TAU 7); glutathione transferase | chr2:12618111-12618871 REVERSEweakly similar to ( 169) GSTX1_TOBAC Probable glutathione S-transferase (EC 2.5.1.18) (Auxin-induced protein PGNT1/PCNT110) - Nicotiana tabacum (Common tobacco)weakly similar to ( 172) loc_os05g34150 12005.m07646 pro…	GSTU7 glutathione S-transferase tau 7
CLUSTER 4	signalling.calcium	potri.t055900.1|pacid:27000354	Transcript	weakly similar to ( 119) AT4G13440 | Symbols: | calcium-binding EF hand family protein | chr4:7810215-7810679 FORWARD no original description	Calcium-binding EF-hand family protein
CLUSTER 4	development.unspecified	potri.006g042200.1|pacid:27003548	Transcript	moderately similar to ( 330) AT2G41380 | Symbols: | embryo-abundant protein-related | chr2:17251981-17252886 FORWARDweakly similar to ( 169) loc_os01g40660 12001.m10336 protein embryonic abundant protein-like, putative, expressed no original description	S-adenosyl-L-methionine-dependent methyltransferases superfamily protein
CLUSTER 4	development.unspecified	potri.018g106000.1|pacid:27009746	Transcript	moderately similar to ( 205) AT3G43630 | Symbols: | nodulin, putative | chr3:15538816-15539418 FORWARDweakly similar to ( 140) NO21_SOYBN Nodulin 21 (N-21) - Glycine max (Soybean)weakly similar to ( 131) loc_os02g43030 12002.m09338 protein conserved mebrane associated protein, DUF125, putative, expressedNodulin-21 Nodulin-21_like_1 DUF125 Nodulin-21_like_2 CCC1_like no original description	Vacuolar iron transporter (VIT) family protein
CLUSTER 4	development.unspecified	potri.t163900.1|pacid:26988935	Transcript	moderately similar to ( 314) AT2G41380 | Symbols: | embryo-abundant protein-related | chr2:17251981-17252886 FORWARDweakly similar to ( 164) loc_os01g40660 12001.m10336 protein embryonic abundant protein-like, putative, expressed no original description	S-adenosyl-L-methionine-dependent methyltransferases superfamily protein
CLUSTER 4	transport.unspecified cations	potri.006g042100.1|pacid:27006848	Transcript	weakly similar to ( 109) AT1G16390 | Symbols: ATOCT3 | ATOCT3 (ARABIDOPSIS THALIANA ORGANIC CATION/CARNITINE TRANSPORTER 3); carbohydrate transmembrane transporter/ sugar:hydrogen symporter | chr1:5602921-5604477 FORWARDvery weakly similar to (80.1) loc_os07g37454 12007.m07995 protein organic cation transporter 3, putative, expressed no original description	3-Oct,ATOCT3 organic cation/carnitine transporter 3
CLUSTER 4	not assigned.unknown	potri.001g008900.1|pacid:27040580	Transcript	moderately similar to ( 332) AT1G55230 | Symbols: | unknown protein | chr1:20602895-20603797 FORWARDmoderately similar to ( 291) loc_os09g27260 12009.m05878 protein TMV response-related gene product, putative, expressedDUF716 no original description
CLUSTER 4	not assigned.unknown	potri.001g091200.1|pacid:27044281	Transcript	no original description
CLUSTER 4	not assigned.unknown	potri.001g408300.1|pacid:27040794	Transcript	no original description
CLUSTER 4	not assigned.unknown	potri.002g177700.1|pacid:27023808	Transcript	no original description
CLUSTER 4	not assigned.unknown	potri.003g153300.1|pacid:26998763	Transcript	no original description
CLUSTER 4	not assigned.unknown	potri.004g202100.1|pacid:26989960	Transcript	no original description
CLUSTER 4	not assigned.unknown	potri.005g089900.1|pacid:27031734	Transcript	no original description
CLUSTER 4	not assigned.unknown	potri.005g193600.1|pacid:27028152	Transcript	no original description
CLUSTER 4	not assigned.unknown	potri.005g193800.1|pacid:27030843	Transcript	no original description
CLUSTER 4	not assigned.unknown	potri.005g193900.1|pacid:27029905	Transcript	ABA_WDS no original description
CLUSTER 4	not assigned.unknown	potri.006g042000.1|pacid:27004901	Transcript	no original description
CLUSTER 4	not assigned.unknown	potri.006g042400.1|pacid:27004419	Transcript	no original description
CLUSTER 4	not assigned.unknown	potri.006g170300.1|pacid:27006055	Transcript	no original description
CLUSTER 4	not assigned.unknown	potri.006g196300.1|pacid:27003892	Transcript	no original description
CLUSTER 4	not assigned.unknown	potri.007g111700.1|pacid:27015249	Transcript	STI STI Kunitz_legume no original description
CLUSTER 4	not assigned.unknown	potri.007g112100.1|pacid:27015962	Transcript	no original description
CLUSTER 4	not assigned.unknown	potri.008g082000.1|pacid:27036531	Transcript	no original description
CLUSTER 4	not assigned.unknown	potri.009g104800.1|pacid:26987053	Transcript	no original description
CLUSTER 4	not assigned.unknown	potri.010g017200.1|pacid:26981906	Transcript	no original description
CLUSTER 4	not assigned.unknown	potri.010g115100.1|pacid:26981423	Transcript	very weakly similar to (96.3) AT2G01300 | Symbols: | unknown protein | chr2:151221-151691 REVERSEvery weakly similar to (89.4) loc_os01g03130 12001.m06952 protein expressed protein no original description
CLUSTER 4	not assigned.unknown	potri.010g250300.1|pacid:26981341	Transcript	no original description
CLUSTER 4	not assigned.unknown	potri.011g126000.1|pacid:27002200	Transcript	no original description
CLUSTER 4	not assigned.unknown	potri.011g126100.1|pacid:27000963	Transcript	no original description
CLUSTER 4	not assigned.unknown	potri.011g149400.1|pacid:27002692	Transcript	no original description
CLUSTER 4	not assigned.unknown	potri.011g158900.1|pacid:27002247	Transcript	no original description
CLUSTER 4	not assigned.unknown	potri.014g006200.1|pacid:27034552	Transcript	no original description
CLUSTER 4	not assigned.unknown	potri.017g151000.1|pacid:26984415	Transcript	no original description
CLUSTER 4	not assigned.unknown	potri.019g015800.1|pacid:27025105	Transcript	no original description
CLUSTER 4	not assigned.unknown	potri.019g078500.1|pacid:27025731	Transcript	no original description
CLUSTER 4	not assigned.unknown	potri.019g088200.1|pacid:27026646	Transcript	STI STI Kunitz_legume no original description
CLUSTER 4	not assigned.unknown	potri.019g100400.1|pacid:27026851	Transcript	no original description
CLUSTER 4	not assigned.unknown	potri.019g102600.1|pacid:27024933	Transcript	no original description
CLUSTER 4	not assigned.unknown	potri.019g117700.1|pacid:27025128	Transcript	no original description
CLUSTER 4	not assigned.unknown	potri.t056700.1|pacid:27014267	Transcript	no original description
CLUSTER 4	not assigned.unknown	potri.t113400.1|pacid:27014313	Transcript	no original description
CLUSTER 4	cell wall.cell wall proteins.AGPs.AGP	potri.019g122600.1|pacid:27025057	Transcript	weakly similar to ( 153) AT5G60490 | Symbols: FLA12 | FLA12 | chr5:24325916-24326665 REVERSEweakly similar to ( 126) loc_os01g06580 12001.m07288 protein fasciclin-like arabinogalactan protein 7 precursor, putative, expressed no original description	FLA12 FASCICLIN-like arabinogalactan-protein 12
CLUSTER 4	lipid metabolism.lipid degradation.lipases.triacylglycerol lipase	potri.014g027800.1|pacid:27034735	Transcript	highly similar to ( 520) AT5G42930 | Symbols: | triacylglycerol lipase | chr5:17210738-17214152 REVERSEmoderately similar to ( 463) loc_os02g52830 12002.m10313 protein triacylglycerol lipase, putative, expressedLipase_3 Lipase_3 Lipase no original description	alpha/beta-Hydrolases superfamily protein
CLUSTER 4	amino acid metabolism.synthesis.aromatic aa.tyrosine.arogenate dehydrogenase \& prephenate dehydrogenase	potri.008g074500.2|pacid:27037492	Transcript	moderately similar to ( 243) AT5G34930 | Symbols: | arogenate dehydrogenase | chr5:13233391-13235522 FORWARDmoderately similar to ( 224) loc_os06g49520 12006.m09476 protein arogenate dehydrogenase isoform 2, putative, expressedTyrA no original description	arogenate dehydrogenase
CLUSTER 4	secondary metabolism.phenylpropanoids.lignin biosynthesis.CAD	potri.009g063300.1|pacid:26988078	Transcript	moderately similar to ( 468) AT4G37990 | Symbols: ELI3-2, ELI3, ATCAD8, CAD-B2 | ELI3-2 (ELICITOR-ACTIVATED GENE 3-2); aryl-alcohol dehydrogenase/ mannitol dehydrogenase | chr4:17855964-17857388 FORWARDhighly similar to ( 560) MTDH_FRAAN Probable mannitol dehydrogenase (EC 1.1.1.255) (NAD-dependent mannitol dehydrogenase) - Fragaria ananassa (Strawberry)moderately similar to ( 414) loc_os10g29470…	CAD7,ELI3,ELI3-1 elicitor-activated gene 3-1
CLUSTER 4	secondary metabolism.phenylpropanoids.lignin biosynthesis.CAD	potri.t149300.1|pacid:27008801	Transcript	moderately similar to ( 489) AT1G72680 | Symbols: ATCAD1, CAD1 | cinnamyl-alcohol dehydrogenase, putative | chr1:27359346-27360876 REVERSEmoderately similar to ( 337) CADH7_PICAB Cinnamyl alcohol dehydrogenase 7/8 (EC 1.1.1.195) (CAD 7/8) - Picea abies (Norway spruce) (Picea excelsa)moderately similar to ( 466) loc_os10g11810 12010.m21843 protein mannitol dehydrogenase, putative, expressedAdhP PR…	CAD1 cinnamyl-alcohol dehydrogenase
CLUSTER 4	hormone metabolism.abscisic acid.induced-regulated-responsive-activated	potri.005g088300.1|pacid:27027464	Transcript	weakly similar to ( 179) AT5G08350 | Symbols: | GRAM domain-containing protein / ABA-responsive protein-related | chr5:2686417-2687175 REVERSEweakly similar to ( 176) loc_os02g42440 12002.m09279 protein FIP1, putative, expressed no original description	GRAM domain-containing protein / ABA-responsive protein-related
CLUSTER 4	hormone metabolism.ethylene.synthesis-degradation	potri.001g355200.1|pacid:27041779	Transcript	moderately similar to ( 322) AT1G17020 | Symbols: SRG1, ATSRG1 | SRG1 (SENESCENCE-RELATED GENE 1); oxidoreductase, acting on diphenols and related substances as donors, oxygen as acceptor / oxidoreductase, acting on paired donors, with incorporation or reduction of molecular oxygen, 2-oxoglutarate as one donor, and inc | chr1:5820258-5821741 FORWARDweakly similar to ( 168) FLS_PETHY Flavonol synt…	SRG1 senescence-related gene 1
CLUSTER 4	hormone metabolism.ethylene.signal transduction	potri.002g039200.1|pacid:27023391	Transcript	weakly similar to ( 101) AT3G23230 | Symbols: | ethylene-responsive factor, putative | chr3:8289647-8290066 REVERSEvery weakly similar to (81.6) loc_os04g18650 12004.m07026 protein pathogenesis-related genes transcriptional activator PTI5, putativeAP2 AP2 no original description	Integrase-type DNA-binding superfamily protein
CLUSTER 4	hormone metabolism.ethylene.signal transduction	potri.005g223200.1|pacid:27029338	Transcript	weakly similar to ( 156) AT3G23240 | Symbols: ERF1, ATERF1 | ERF1 (ETHYLENE RESPONSE FACTOR 1); DNA binding / transcription activator/ transcription factor | chr3:8295705-8296361 FORWARDvery weakly similar to (83.2) ERF5_TOBAC Ethylene-responsive transcription factor 5 (Ethylene-responsive element-binding factor 5 homolog) (EREBP-4) (NtERF4) - Nicotiana tabacum (Common tobacco)weakly similar to (…	,ERF1 ethylene response factor 1
CLUSTER 4	hormone metabolism.ethylene.signal transduction	potri.008g166200.1|pacid:27036192	Transcript	weakly similar to ( 186) AT3G23240 | Symbols: ERF1, ATERF1 | ERF1 (ETHYLENE RESPONSE FACTOR 1); DNA binding / transcription activator/ transcription factor | chr3:8295705-8296361 FORWARDvery weakly similar to (89.4) ERF5_NICSY Ethylene-responsive transcription factor 5 (Ethylene-responsive element-binding factor 5 homolog) (EREBP-4) (NsERF4) - Nicotiana sylvestris (Wood tobacco)weakly similar to …	ERF1 ethylene response factor 1
CLUSTER 4	hormone metabolism.ethylene.signal transduction	potri.010g072400.1|pacid:26978649	Transcript	very weakly similar to (80.5) AT3G23230 | Symbols: | ethylene-responsive factor, putative | chr3:8289647-8290066 REVERSEAP2 AP2 no original description	Integrase-type DNA-binding superfamily protein
CLUSTER 4	major CHO metabolism.degradation.sucrose.Susy	potri.002g195500.1|pacid:27021188	Transcript	weakly similar to ( 131) AT1G73370 | Symbols: SUS6, ATSUS6 | SUS6 (SUCROSE SYNTHASE 6); UDP-glycosyltransferase/ sucrose synthase | chr1:27584533-27588326 REVERSEvery weakly similar to (94.4) SUS2_SOLTU Sucrose synthase (EC 2.4.1.13) (Sucrose-UDP glucosyltransferase) (SS65) - Solanum tuberosum (Potato)weakly similar to ( 124) loc_os04g24430 12004.m07574 protein sucrose synthase 2, putative, expre…	ATSUS6,SUS6 sucrose synthase 6
CLUSTER 4	stress.abiotic.touch/wounding	potri.013g148000.1|pacid:26995971	Transcript	very weakly similar to (87.0) AT4G10270 | Symbols: | wound-responsive family protein | chr4:6374805-6375077 FORWARD no original description	Wound-responsive family protein
CLUSTER 4	stress.abiotic.unspecified	potri.004g180100.1|pacid:26989882	Transcript	moderately similar to ( 263) AT5G39130 | Symbols: | germin-like protein, putative | chr5:15665638-15666413 REVERSEmoderately similar to ( 209) GLP1_MESCR Germin-like protein precursor - Mesembryanthemum crystallinum (Common ice plant)moderately similar to ( 224) loc_os02g29000 12002.m08044 protein germin-like protein subfamily 1 member 11 precursor, putativeCupin_1 no original description	RmlC-like cupins superfamily protein
CLUSTER 4	stress.abiotic.unspecified	potri.004g180200.1|pacid:26992553	Transcript	moderately similar to ( 233) AT5G39130 | Symbols: | germin-like protein, putative | chr5:15665638-15666413 REVERSEmoderately similar to ( 201) GLP1_MESCR Germin-like protein precursor - Mesembryanthemum crystallinum (Common ice plant)moderately similar to ( 214) loc_os02g29000 12002.m08044 protein germin-like protein subfamily 1 member 11 precursor, putativeCupin_1 no original description	RmlC-like cupins superfamily protein
CLUSTER 4	stress.abiotic.unspecified	potri.009g140400.1|pacid:26987423	Transcript	moderately similar to ( 237) AT5G39110 | Symbols: | germin-like protein, putative | chr5:15657802-15658584 REVERSEmoderately similar to ( 202) GLP1_MESCR Germin-like protein precursor - Mesembryanthemum crystallinum (Common ice plant)moderately similar to ( 218) loc_os08g08960 12008.m05031 protein germin-like protein subfamily 1 member 11 precursor, putative, expressedCupin_1 no original descript…	RmlC-like cupins superfamily protein
CLUSTER 4	nucleotide metabolism.salvage.NUDIX hydrolases	potri.001g069200.1|pacid:27043375	Transcript	moderately similar to ( 213) AT1G12880 | Symbols: atnudt12 | atnudt12 (Arabidopsis thaliana Nudix hydrolase homolog 12); hydrolase | chr1:4390036-4391046 FORWARDmoderately similar to ( 210) loc_os11g32750 12011.m28680 protein nudix hydrolase 13, mitochondrial precursor, putative, expressedNudix_Hydrolase_9 no original description	NUDT12 nudix hydrolase homolog 12
CLUSTER 4	RNA.regulation of transcription.MYB domain transcription factor family	potri.015g046200.1|pacid:27018250	Transcript	moderately similar to ( 233) AT1G25340 | Symbols: MYB116 | MYB116 (myb domain protein 116); DNA binding / transcription factor | chr1:8885210-8886271 FORWARDweakly similar to ( 153) MYBA2_ORYSA Myb-related protein MYBAS2 - Oryza sativa (Rice)moderately similar to ( 245) loc_os01g03720 12001.m07009 protein MYB transcription factor, putative, expressed no original description	MYB116 myb domain protein 116
CLUSTER 4	RNA.regulation of transcription.Trihelix, Triple-Helix transcription factor family	potri.006g117500.1|pacid:27006027	Transcript	moderately similar to ( 223) AT3G10040 | Symbols: | transcription factor | chr3:3096580-3097875 REVERSEweakly similar to ( 188) loc_os11g06410 12011.m28738 protein expressed protein no original description	sequence-specific DNA binding transcription factors
CLUSTER 4	RNA.regulation of transcription.WRKY domain transcription factor family	potri.012g101000.1|pacid:27049229	Transcript	weakly similar to ( 147) AT5G13080 | Symbols: WRKY75, ATWRKY75 | WRKY75; transcription factor | chr5:4149928-4151019 REVERSEweakly similar to ( 150) loc_os11g29870 12011.m06896 protein OsWRKY72 - Superfamily of rice TFs having WRKY and zinc finger domains, expressedWRKY no original description	WRKY75 WRKY DNA-binding protein 75
CLUSTER 4	RNA.regulation of transcription.WRKY domain transcription factor family	potri.014g155100.1|pacid:27033572	Transcript	moderately similar to ( 276) AT1G62300 | Symbols: WRKY6, ATWRKY6 | WRKY6; transcription factor | chr1:23016887-23019155 REVERSEmoderately similar to ( 240) loc_os01g14440 12001.m08049 protein OsWRKY1v2 - Superfamily of rice TFs having WRKY and zinc finger domains, expressedWRKY no original description	WRKY6 WRKY family transcription factor
CLUSTER 4	RNA.regulation of transcription.AS2,Lateral Organ Boundaries Gene Family	potri.004g100100.1|pacid:26990271	Transcript	moderately similar to ( 265) AT3G02550 | Symbols: LBD41 | LBD41 (LOB DOMAIN-CONTAINING PROTEIN 41) | chr3:536747-537650 REVERSEmoderately similar to ( 228) loc_os01g32770 12001.m09596 protein seed specific protein Bn15D17A, putative, expressedDUF260 no original description	LBD41 LOB domain-containing protein 41
CLUSTER 4	RNA.regulation of transcription.AS2,Lateral Organ Boundaries Gene Family	potri.012g056800.1|pacid:27049631	Transcript	weakly similar to ( 186) AT3G02550 | Symbols: LBD41 | LBD41 (LOB DOMAIN-CONTAINING PROTEIN 41) | chr3:536747-537650 REVERSEweakly similar to ( 182) loc_os01g32770 12001.m09596 protein seed specific protein Bn15D17A, putative, expressedDUF260 no original description	LBD41 LOB domain-containing protein 41
CLUSTER 4	protein.aa activation.pseudouridylate synthase	potri.010g226800.1|pacid:26980028	Transcript	very weakly similar to (81.3) AT2G39140 | Symbols: SVR1 | SVR1 (SUPPRESSOR OF VARIEGATION 1); RNA binding / pseudouridine synthase | chr2:16330238-16333153 FORWARD no original description	pseudouridine synthase family protein
CLUSTER 4	protein.targeting.chloroplast	potri.002g078400.1|pacid:27020988	Transcript	weakly similar to ( 117) AT1G21650 | Symbols: | ATP binding / protein binding | chr1:7592891-7600590 REVERSEweakly similar to ( 115) loc_os11g08980 12011.m05095 protein ATP binding protein, putative, expressed no original description	Preprotein translocase SecA family protein
CLUSTER 4	protein.degradation.ubiquitin.E3.RING	potri.014g048000.1|pacid:27032156	Transcript	weakly similar to ( 158) AT3G60300 | Symbols: | RWD domain-containing protein | chr3:22285371-22287382 FORWARDweakly similar to ( 129) loc_os11g35870 12011.m28900 protein ubiquitin-protein ligase/ zinc ion binding protein, putative, expressed no original description	RWD domain-containing protein
CLUSTER 4	signalling.receptor kinases.misc	potri.016g129500.1|pacid:27013440	Transcript	weakly similar to ( 172) AT5G01740 | Symbols: | FUNCTIONS IN: molecular_function unknown; INVOLVED IN: biological_process unknown; LOCATED IN: cellular_component unknown; EXPRESSED IN: 18 plant structures; EXPRESSED DURING: 9 growth stages; CONTAINS InterPro DOMAIN/s: Wound-induced protein, Wun1 (InterPro:IPR009798); BEST Arabidopsis thaliana protein match is: SAG20 (SENESCENCE ASSOCIATED GENE 20…	Nuclear transport factor 2 (NTF2) family protein
CLUSTER 4	transport.Major Intrinsic Proteins.TIP	potri.004g216500.1|pacid:26992862	Transcript	moderately similar to ( 298) AT4G01470 | Symbols: GAMMA-TIP3, TIP1;3 | TIP1;3 (TONOPLAST INTRINSIC PROTEIN 1;3); urea transmembrane transporter/ water channel | chr4:625092-625850 REVERSEmoderately similar to ( 280) TIP11_ORYSA Probable aquaporin TIP1.1 (Tonoplast intrinsic protein 1.1) (OsTIP1.1) (rTIP1) - Oryza sativa (Rice)moderately similar to ( 280) loc_os03g05290 12003.m06053 protein aquapo…	GAMMA-TIP,GAMMA-TIP1,TIP1;1 gamma tonoplast intrinsic protein
